# Supplementary material
Source: PubMed Central journal article supplement (PMC9665966)
Supplement: mmc1.pdf [file mmc1.pdf]

# THE LANCET

## Infectious Diseases

### Supplementary appendix

This appendix formed part of the original submission and has been peer reviewed.  
We post it as supplied by the authors.

Supplement to: Schenk J, Abrams S, Theeten H, Damme PV, Beutels P, Hens N.  
Immunogenicity and persistence of trivalent measles, mumps, and rubella vaccines:  
a systematic review and meta-analysis. *Lancet Infect Dis* 2020; published online  
September 1. [https://doi.org/10.1016/S1473-3099\(20\)30442-4](https://doi.org/10.1016/S1473-3099(20)30442-4).

## Appendix

Schenk *et al*, Immunogenicity and persistence of trivalent measles, mumps and rubella vaccines: a systematic review and meta-analysis

|                                                             |           |
|-------------------------------------------------------------|-----------|
| Appendix 1: PRISMA checklist .....                          | 2         |
| Appendix 2: Search strategy .....                           | 5         |
| Appendix 3: Inclusion and exclusion criteria extended.....  | 10        |
| Appendix 4: Exponential waning rates.....                   | 11        |
| Appendix 5: Methodology meta-analysis.....                  | 12        |
| Appendix 6: Risk of bias assessment form.....               | 14        |
| Appendix 7: Seroconversion rates per dose and per age ..... | 17        |
| Appendix 8: Seroconversion rates per different strain ..... | 18        |
| Appendix 9: Different estimators for $\tau_2$ .....         | 19        |
| Appendix 10: Seroconversion per test of detection.....      | 20        |
| Appendix 11: Seroconversion and persistence per region..... | 21        |
| Appendix 12: Risk of bias assessment .....                  | 22        |
| Appendix 13: Publication bias .....                         | 25        |
| Appendix 14: Supplementary tables.....                      | 27        |
| Appendix 15: Supplementary figures .....                    | 41        |
| <b>REFERENCES</b> .....                                     | <b>46</b> |

## Appendix 1: PRISMA checklist

| Section/topic             | #  | Checklist item                                                                                                                                                                                                                                                                                              | Reported on page #     |
|---------------------------|----|-------------------------------------------------------------------------------------------------------------------------------------------------------------------------------------------------------------------------------------------------------------------------------------------------------------|------------------------|
| <b>TITLE</b>              |    |                                                                                                                                                                                                                                                                                                             |                        |
| Title                     | 1  | Identify the report as a systematic review, meta-analysis, or both.                                                                                                                                                                                                                                         | 1                      |
| <b>ABSTRACT</b>           |    |                                                                                                                                                                                                                                                                                                             |                        |
| Structured summary        | 2  | Provide a structured summary including, as applicable: background; objectives; data sources; study eligibility criteria, participants, and interventions; study appraisal and synthesis methods; results; limitations; conclusions and implications of key findings; systematic review registration number. | 2                      |
| <b>INTRODUCTION</b>       |    |                                                                                                                                                                                                                                                                                                             |                        |
| Rationale                 | 3  | Describe the rationale for the review in the context of what is already known.                                                                                                                                                                                                                              | 5                      |
| Objectives                | 4  | Provide an explicit statement of questions being addressed with reference to participants, interventions, comparisons, outcomes, and study design (PICOS).                                                                                                                                                  | 6                      |
| <b>METHODS</b>            |    |                                                                                                                                                                                                                                                                                                             |                        |
| Protocol and registration | 5  | Indicate if a review protocol exists, if and where it can be accessed (e.g., Web address), and, if available, provide registration information including registration number.                                                                                                                               | 7                      |
| Eligibility criteria      | 6  | Specify study characteristics (e.g., PICOS, length of follow-up) and report characteristics (e.g., years considered, language, publication status) used as criteria for eligibility, giving rationale.                                                                                                      | 7-8 and appendix 3 p10 |
| Information sources       | 7  | Describe all information sources (e.g., databases with dates of coverage, contact with study authors to identify additional studies) in the search and date last searched.                                                                                                                                  | 7-8                    |
| Search                    | 8  | Present full electronic search strategy for at least one database, including any limits used, such that it could be repeated.                                                                                                                                                                               | Appendix 2 page 5-9    |
| Study selection           | 9  | State the process for selecting studies (i.e., screening, eligibility, included in systematic review, and, if applicable, included in the meta-analysis).                                                                                                                                                   | 7-8 and appendix 3 p10 |
| Data collection process   | 10 | Describe method of data extraction from reports (e.g., piloted forms, independently, in duplicate) and any processes for obtaining and confirming data from investigators.                                                                                                                                  | 7                      |

|                                    |    |                                                                                                                                                                                                                        |                        |
|------------------------------------|----|------------------------------------------------------------------------------------------------------------------------------------------------------------------------------------------------------------------------|------------------------|
| Data items                         | 11 | List and define all variables for which data were sought (e.g., PICOS, funding sources) and any assumptions and simplifications made.                                                                                  | 7-8                    |
| Risk of bias in individual studies | 12 | Describe methods used for assessing risk of bias of individual studies (including specification of whether this was done at the study or outcome level), and how this information is to be used in any data synthesis. | 7-8                    |
| Summary measures                   | 13 | State the principal summary measures (e.g., risk ratio, difference in means).                                                                                                                                          | 8 and appendix 5 p12   |
| Synthesis of results               | 14 | Describe the methods of handling data and combining results of studies, if done, including measures of consistency (e.g., $I^2$ ) for each meta-analysis.                                                              | 8-9 and appendix 5 p12 |

| Section/topic                 | #  | Checklist item                                                                                                                                                                                           | Reported on page #                   |
|-------------------------------|----|----------------------------------------------------------------------------------------------------------------------------------------------------------------------------------------------------------|--------------------------------------|
| Risk of bias across studies   | 15 | Specify any assessment of risk of bias that may affect the cumulative evidence (e.g., publication bias, selective reporting within studies).                                                             | 8-9, appendix 12 and 13              |
| Additional analyses           | 16 | Describe methods of additional analyses (e.g., sensitivity or subgroup analyses, meta-regression), if done, indicating which were pre-specified.                                                         | 9                                    |
| <b>RESULTS</b>                |    |                                                                                                                                                                                                          |                                      |
| Study selection               | 17 | Give numbers of studies screened, assessed for eligibility, and included in the review, with reasons for exclusions at each stage, ideally with a flow diagram.                                          | 10, Fig 1                            |
| Study characteristics         | 18 | For each study, present characteristics for which data were extracted (e.g., study size, PICOS, follow-up period) and provide the citations.                                                             | 10, Table S8, S9-14                  |
| Risk of bias within studies   | 19 | Present data on risk of bias of each study and, if available, any outcome level assessment (see item 12).                                                                                                | appendix 12 pp 22-24                 |
| Results of individual studies | 20 | For all outcomes considered (benefits or harms), present, for each study: (a) simple summary data for each intervention group (b) effect estimates and confidence intervals, ideally with a forest plot. | 10, 12, Fig 2, 3, 4, S7, S12 and S13 |

|                             |    |                                                                                                                                                                                      |                             |
|-----------------------------|----|--------------------------------------------------------------------------------------------------------------------------------------------------------------------------------------|-----------------------------|
| Synthesis of results        | 21 | Present results of each meta-analysis done, including confidence intervals and measures of consistency.                                                                              | 10-12                       |
| Risk of bias across studies | 22 | Present results of any assessment of risk of bias across studies (see Item 15).                                                                                                      | 11 and appendix 10 and 11   |
| Additional analysis         | 23 | Give results of additional analyses, if done (e.g., sensitivity or subgroup analyses, meta-regression [see Item 16]).                                                                | 11 appendix 7, 9, 11 and 11 |
| <b>DISCUSSION</b>           |    |                                                                                                                                                                                      |                             |
| Summary of evidence         | 24 | Summarize the main findings including the strength of evidence for each main outcome; consider their relevance to key groups (e.g., healthcare providers, users, and policy makers). | 12-17                       |
| Limitations                 | 25 | Discuss limitations at study and outcome level (e.g., risk of bias), and at review-level (e.g., incomplete retrieval of identified research, reporting bias).                        | 16-17                       |
| Conclusions                 | 26 | Provide a general interpretation of the results in the context of other evidence, and implications for future research.                                                              | 17                          |
| <b>FUNDING</b>              |    |                                                                                                                                                                                      |                             |
| Funding                     | 27 | Describe sources of funding for the systematic review and other support (e.g., supply of data); role of funders for the systematic review.                                           | 9                           |

## Appendix 2: Search strategy

We searched the following electronic bibliographic databases: PudMed (incl. MEDLINE), Web of Science and EMBASE. We made use of controlled vocabulary, MeSH (PubMed), Emtree (Embase) as well as Title/abstract in PubMed. In Web of Science only free-text searching is possible. Articles in English from the earliest dates to October 2018 were considered eligible. Furthermore, an additional manual search was performed by screening the reference lists from reviews and eligible publications to ensure that important publications are not omitted from our systematic review and meta-analysis. For the database Embase, we restricted only to Embase search (excluding MEDLINE) since MEDLINE was already covered by PubMed. The used search terms were related to immunogenicity (primary vaccine failure) and persistence (secondary vaccine failure) of the trivalent MMR vaccine.

The search strategy and results for each database are listed below.

### **PUBMED (including medline)**

First search term: 22/06/2018 and second search term: 25/7/2018

Searching terms: Title/abstract (TA) and controlled vocabulary (SH)

### **Update**

First and second search term until 31/12/2019: 66 and 55 extra hits

---

#### **First search term:**

1. SH.: (measles OR mumps OR rubella OR MMR) AND ( immunogenicity OR seroconversion OR primary vaccine failure)
2. TA. (measles OR mumps OR rubella OR MMR) AND ( immunogenicity OR seroconversion OR primary vaccine failure)

Search query:

```
((measles[MeSH Terms] OR measles[Title/Abstract]) OR(mumps[MeSH Terms] OR mumps[Title/Abstract]) OR(rubella[MeSH Terms] OR rubella[Title/Abstract]) OR (MMR[MeSH Terms] OR MMR[Title/Abstract])) AND ((immunogenicity[MeSH Terms] OR immunogenicity[Title/Abstract]) OR (seroconversion[MeSH Terms]) OR seroconversion[Title/Abstract]) OR (primary vaccine failure[MeSH Terms]) OR primary vaccine failure[Title/Abstract]))
```

In total 919 articles found (search #40 in picture below)

| Search | Add to builder | Query                                                                                                                                                                                                                                                                                                                                                                                                                                      | Items found | Time     |
|--------|----------------|--------------------------------------------------------------------------------------------------------------------------------------------------------------------------------------------------------------------------------------------------------------------------------------------------------------------------------------------------------------------------------------------------------------------------------------------|-------------|----------|
| #40    | Add            | Search ((measles[MeSH Terms] OR measles[Title/Abstract]) OR(mumps[MeSH Terms] OR mumps[Title/Abstract]) OR(rubella[MeSH Terms] OR rubella[Title/Abstract]) OR (MMR[MeSH Terms] OR MMR[Title/Abstract])) AND ((immunogenicity[MeSH Terms] OR immunogenicity[Title/Abstract]) OR (seroconversion[MeSH Terms]) OR seroconversion[Title/Abstract]) OR (primary vaccine failure[MeSH Terms]) OR primary vaccine failure[Title/Abstract])        | 919         | 07:19:00 |
| #38    | Add            | Search ((measles[MeSH Terms] OR measles[Title/Abstract]) AND (mumps[MeSH Terms] OR mumps[Title/Abstract]) AND (rubella[MeSH Terms] OR rubella[Title/Abstract]) AND (MMR[MeSH Terms] OR MMR[Title/Abstract])) AND ((immunogenicity[MeSH Terms] OR immunogenicity[Title/Abstract]) AND (seroconversion[MeSH Terms]) OR seroconversion[Title/Abstract]) AND (primary vaccine failure[MeSH Terms]) OR primary vaccine failure[Title/Abstract]) | 53          | 07:16:48 |
| #39    | Add            | Search ((measles[MeSH Terms] OR measles[Title/Abstract]) AND (mumps[MeSH Terms] OR mumps[Title/Abstract]) AND (rubella[MeSH Terms] OR rubella[Title/Abstract]) AND (MMR[MeSH Terms] OR MMR[Title/Abstract])) AND ((immunogenicity[MeSH Terms] OR immunogenicity[Title/Abstract]) AND (seroconversion[MeSH Terms]) OR seroconversion[Title/Abstract]) AND (primary vaccine failure[MeSH Terms]) OR primary vaccine failure[Title/Abstract]) | 49          | 07:16:44 |

**Figure S1:** Details of the search strategy in PubMed for immunogenicity of MMR vaccine.

**Second search term:**

3. SH:. (measles OR mumps OR rubella OR MMR) AND ( persistence OR waning OR immuni\* OR secondary vaccine failure)
4. TA. (measles OR mumps OR rubella OR MMR) AND ( persistence OR waning OR immuni\* OR secondary vaccine failure)

Originally immuni\* was in the search query but this gave a lot of hits and was too much to go through with only two reviewers (Search #1 in picture below). Therefore a test run without immuni\* was done and we checked whether the articles, found in a previous performed extensive, though not systematic, search from our research team were identified (Abrams et al, 2014)<sup>1</sup>. All were found in the search query without immuni\*, except two but those were found in the references from other included articles. Thus, we decided to go further without the search term immuni\* which gave 761 hits (Search #2 in picture below).

Search query without immuni\*:

((measles[MeSH Terms] OR measles[Title/Abstract]) OR(mumps[MeSH Terms] OR mumps[Title/Abstract]) OR(rubella[MeSH Terms] OR rubella[Title/Abstract]) OR (MMR[MeSH Terms] OR MMR[Title/Abstract])) AND ((persistence [MeSH Terms] OR persistence [Title/Abstract]) OR (waning [MeSH Terms]) OR waning [Title/Abstract]) OR (secondary vaccine failure[MeSH Terms]) OR secondary vaccine failure[Title/Abstract]))

PubMed Advanced Search Builder

The following terms were not found in PubMed: MMR[MeSH Terms], persistence[MeSH Terms], waning[MeSH Terms], failure[MeSH Terms].

Use the builder below to create your search

[Edit](#) [Clear](#)

Builder

All Fields  [Show index list](#)

AND All Fields  [Show index list](#)

[Search](#) or [Add to history](#)

History [Download history](#) [Clear history](#)

| Search | Add to builder      | Query                                                                                                                                                                                                                                                                                                                                                                                                                                                                      | Items found | Time     |
|--------|---------------------|----------------------------------------------------------------------------------------------------------------------------------------------------------------------------------------------------------------------------------------------------------------------------------------------------------------------------------------------------------------------------------------------------------------------------------------------------------------------------|-------------|----------|
| #2     | <a href="#">Add</a> | Search ((measles[MeSH Terms] OR measles[Title/Abstract]) OR(mumps[MeSH Terms] OR mumps[Title/Abstract]) OR(rubella[MeSH Terms] OR rubella[Title/Abstract]) OR (MMR[MeSH Terms] OR MMR[Title/Abstract])) AND ((persistence [MeSH Terms] OR persistence [Title/Abstract]) OR (waning [MeSH Terms] OR waning [Title/Abstract]) OR (secondary vaccine failure[MeSH Terms]) OR secondary vaccine failure[Title/Abstract]))                                                      | 761         | 08:27:55 |
| #1     | <a href="#">Add</a> | Search ((measles[MeSH Terms] OR measles[Title/Abstract]) OR(mumps[MeSH Terms] OR mumps[Title/Abstract]) OR(rubella[MeSH Terms] OR rubella[Title/Abstract]) OR (MMR[MeSH Terms] OR MMR[Title/Abstract])) AND ((persistence [MeSH Terms] OR persistence [Title/Abstract]) OR (waning [MeSH Terms] OR waning [Title/Abstract]) OR (immun* [MeSH Terms]) OR immun* [Title/Abstract]) OR (secondary vaccine failure[MeSH Terms]) OR secondary vaccine failure[Title/Abstract])) | 610285      | 08:27:37 |

Figure S2: Details of the search strategy in PubMed for persistence of MMR vaccine.

## Web of Science

First search term: 13/08/2018 and second search term: 20/8/2018

Searching terms: Search Terms: free text (FT). TI = title and TS = Topic

## Update

First and second search term until 31/12/2019: 126 and 120 extra hits

### First search term:

1. FT: TS=(measles OR mumps OR rubella OR MMR) OR TI=(measles OR mumps OR rubella OR MMR)
2. FT: TS=(immunogenicity OR seroconversion OR primary vaccine failure) OR TI=(immunogenicity OR seroconversion OR primary vaccine failure)

This resulted in 847 hits (Result # 4, in picture below)



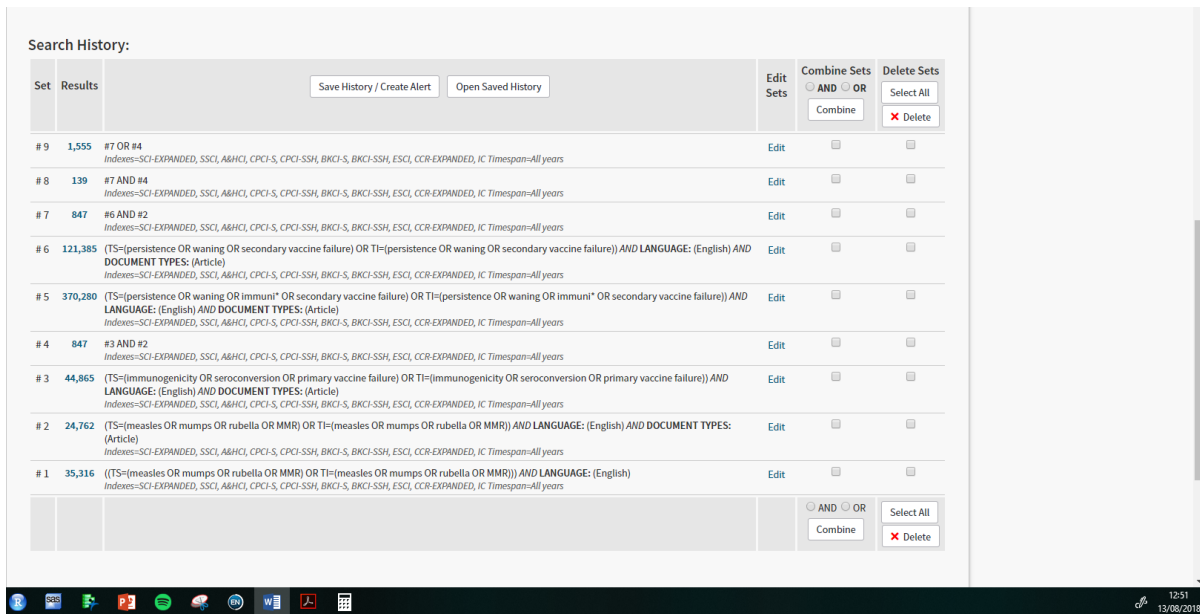

**Figure S3:** Details of the search strategy in WOS for immunogenicity of MMR vaccine.

**Second search term:**

1. FT: TS=(measles OR mumps OR rubella OR MMR) OR TI=(measles OR mumps OR rubella OR MMR)
2. FT: TS=(persistence OR waning OR secondary vaccine failure) OR TI=(persistence OR waning OR secondary vaccine failure)

This resulted in 778 hits (Results #3 in picture below)

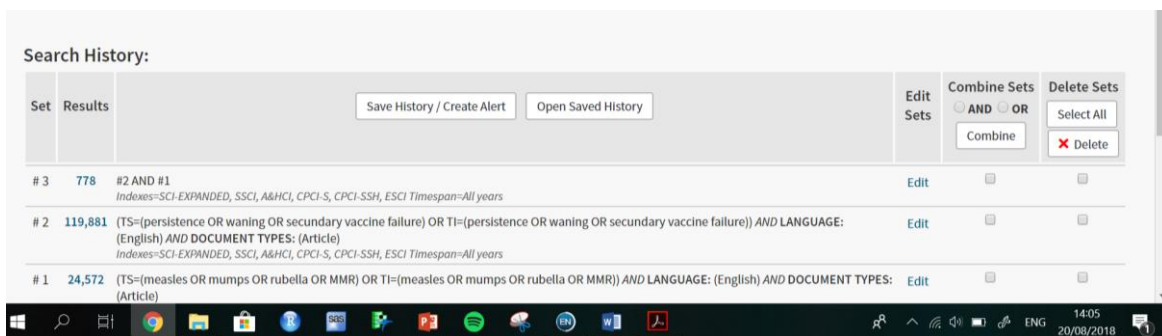

**Figure S4:** Details of the search strategy in WOS for persistence of MMR vaccine.

**Embase**

First search term: 2/10/2018 and second search term: 2/10/2018

Searching terms: Search Terms: free text (FT) and controlled vocabulary (SH)

## Update

First and second search term until 31/12/2019: 138 and 83 extra hits

---

### First search term:

1. FT: (measles OR mumps OR rubella OR MMR) AND ( immunogenicity OR seroconversion OR primary vaccine failure)
2. SH: (measles OR mumps OR rubella OR MMR) AND ( immunogenicity OR seroconversion OR primary vaccine failure)

There was the option to search only in Embase, or including Medline. We choose only Embase, because Medline was already covered in Pudmed. Only humans and English articles were used in the search term to reduce the amount articles.

This resulted in 1460 hits.

Due to bad picture quality, no screenshot is available from the Embase search

### Second search term:

1. FT: (measles OR mumps OR rubella OR MMR) AND ( persistence OR waning OR secondary vaccine failure)
2. SH: (measles OR mumps OR rubella OR MMR) ( persistence OR waning OR secondary vaccine failure)

There was the option to search only in Embase, or including Medline. We choose only Embase, because Medline was already covered in Pudmed. Only humans and English articles were used in the search term to reduce the amount articles.

This resulted in 676 hits. Also due to bad picture quality, no screenshot is available from the Embase search.

### **Appendix 3: Inclusion and exclusion criteria extended**

The reviewers (JS and SA) read the abstract of each identified publication when the total number of potentially eligible publications is less than 2000. Otherwise, the reviewers selected potentially eligible titles first and read thereafter the abstracts of publications with titles that potentially fit the inclusion criteria. The full-text of articles was reviewed in case there was doubt after screening of the title and abstract. The full-text of all eligible articles was read and data was retrieved to perform the meta-analyses.

We excluded cross-sectional serological surveys (as they do not evaluate seroconversion after vaccination or persistence of vaccine-induced humoral immunity with time since an MMR vaccination), outbreak studies and case-reports (as it is not the same type of data that we collected for the waning part). Studies with an unclear description are defined as studies that could potentially be included but for which both researchers (JS and SA) found that the description of the methodology therein was unclear or when studies did not contain useable data were excluded.

“The study is a clinical trial, cohort, longitudinal study” reflects the broad range of studies we wanted to include. With clinical trial we wanted to make it broad, including phase I/II as well as phase III randomized (controlled) trials, but the studies had to have clearly investigated the immunogenicity (seroconversion) of a combined MMR vaccine, either as a single primary goal or as a by-product in the comparison of such trivalent MMR vaccines with quadrivalent formulations including a varicella component, with a combination of mono- and/or bivalent vaccines or with co-administration together with other vaccines. Longitudinal studies are required for the evaluation of the duration (persistence/waning) of humoral protection, i.e., (repeated) measurements (based on collected blood samples) done at different time points in order to evaluate how many individuals were still seropositive at a given time after receiving a dose of the MMR vaccine

More details in PROSPERO protocol. <sup>2</sup>

## Appendix 4: Exponential waning rates

The annual waning rate indicates to what extent the seropositivity decreases over time. It is the proportion seropositives at time point  $t+1$  which is a factor  $e^{(-waning\ rate)}$  from the proportion seropositives at time point  $t$ . Thus  $1 - e^{(-waning\ rate*\Delta t)}$  is the chance of seropositivity loss, where  $\Delta t$  is the time (in years) after MMR vaccination.

We used three different methods to estimate the exponential waning rates because not all studies reported the same type of data. More specifically, in some studies repeated measurements on the same individuals were done over time, thereby imposing association in the data which needs to be adequately addressed in the statistical analysis. More details regarding the information we exactly extracted from the eligible studies for waning and which method is used, is displayed in **Tables S12** (p 36), **S13** (p 38) and **S14** (p40).

All studies evaluated the amount of IgG antibodies, or seropositivity for that matter, after receiving an MMR dose (first or second dose), at different time points. We estimated the exponential waning rate from a model describing (exponential) decay in seropositivity (either generalized linear model or generalized estimating equations). For studies that only provided a single time point at which the number of seropositives was reported, starting from a group of individuals that were all seroconverted, an empirical estimate of the waning rate was calculated as follows:

$$\gamma = - \frac{(1 - p)}{t}$$

, where  $p$  is the proportion of seropositives at time point  $t$  (with time the time after vaccination).

## Appendix 5: Methodology meta-analysis

In a fixed effects meta-analysis model, we assume that the only reason why  $k$  independent effect size estimates  $\hat{\theta}_i$ ,  $i = 1, \dots, k$ , each estimating the (true) effect size  $\theta$ , deviate from the true value due to sampling error:

$$\begin{aligned}\hat{\theta}_i &= \theta + e_i \\ y_i &= \theta_i + e_i\end{aligned}$$

where  $y_i$  denotes the observed effects, in this case either the seroconversion rates or the retrieved waning rates, in the  $i$ -th study,  $\theta_i$  the corresponding unknown true effect and  $e_i$  is the sampling error with  $e_i \sim N(0, v_i)$ . Thus,  $y_i$  is assumed to be unbiased and normally distributed estimated of their corresponding true effect. As the effect estimates are proportions in case of estimating seroconversion rates, a bias correction, normalizing, and variance stabilizing transformation is necessary to ensure that these assumptions are at least approximately true. Therefore, we used the Freeman-Tukey double arcsine variance-stabilizing transformation<sup>3</sup> which enables calculating an overall proportion from a set of proportions, together with inverse-variance weighting. For waning, the retrieved waning rates were log-transformed. Due to differences in study methods and sample characteristics, variability or heterogeneity may be introduced among the true effects which can be treated as purely random, forming a meta-analysis random effects model:

$$\begin{aligned}\theta_i &= \mu + u_i, \\ y_i &= \mu + u_i + e_i,\end{aligned}$$

with  $u_i \sim N(0, \tau^2)$ . It is assumed that the true effects are normally distributed with mean  $\mu$  and variance  $\tau^2$ . Here, we used the DerSimonian-Laird estimator for the between-study variability<sup>4,5</sup>. Confidence intervals for the combined effect are constructed using the Knapp and Hartung method (2003)<sup>6</sup>, which is an adjustment to the standard errors for taking into account the uncertainty in  $\tau^2$ . This is performed for both seroconversion and waning rates. We investigated the heterogeneity in the estimated overall seroconversion and waning rates using the  $I^2$  statistic<sup>7</sup>.

As secondary analysis, we also subdivided the studies per vaccine strain for measles and mumps in order to estimate the strain-specific seroconversion rates. A subdivision based on method of detection (ELISA or other test) is also carried out in order to see whether it influenced the seroconversion rate of measles, mumps or rubella. We also tested whether MMR dose (MMR1 or MMR2), age of administration (below 1 year, between 1-2 years and above two years) or region affected the seroconversion rate of measles, mumps and rubella. Differences in the amount of heterogeneity are suspected to be present within the different vaccine strains of measles and mumps,

method of detection, MMR dose and age of administration. Therefore, a single mixed-effect model with strain as fixed effect is fitted for measles, mumps and rubella. The model goes as follows:

$$\theta_i = \beta_0 + \beta_j x_{ij} + u_i,$$
$$y_i = \beta_0 + \beta_j x_{ij} + u_i + e_i,$$

where  $x_{ij}$  denotes the value of the  $j$ -th moderator, here strain type of measles/ mumps or type of detection method, for the  $i$ -th study and  $u_i \sim N(0, \tau^2)$ . Here,  $\tau^2$  denotes the amount of residual heterogeneity among the true effects, meaning the variability among the true effects that is not accounted for by the moderators included in the model. We examine here to what extent the moderators included in the model influence the size of the average true effect by using an omnibus test implemented in metafor R package.<sup>8</sup>

## Appendix 6: Risk of bias assessment form

We used five domains for risk of bias as specified by Cochrane Risk of Bias Tool to assess the potential sources for risk of bias<sup>9</sup>

1. Selection bias – sequence generation
2. Selection bias – allocation concealment
3. Attribution/performance/detection – blinding of all outcomes
4. Attribution bias – incomplete data
5. Measurement bias – Clear description of quantification method and cut-off values

The category “not applicable” was added to the risk of bias assessment because not all questions were applicable for all studies.

## Risk assesment of included articles

For each included publication

1. Selection bias - sequence generation
2. Selection bias - allocation concealment
3. Performance/attrition/detection bias - blinding
4. Incomplete outcome data
5. Measurement bias

\*Vereist

Name of reviewer \*

JS

SA

Author of article \*

Jouw antwoord

---

Title of article \*

Jouw antwoord

---

Year of publication \*

Jouw antwoord

---

Article concerning seroconversion or waning or MMR vaccine? \*

Seroconversion

Waning

### Risk of bias in words

Brief summary of:

1. Selection bias - sequence generation
2. Selection bias - allocation concealment
3. Performance/attrition/detection bias - blinding
4. Incomplete outcome data
5. Measurement bias: clear description of test used with cut-offs values.

Categorize into high, low and unclear

Selection bias - sequence generation. Did the study use a randomized sequence of assignments?

Jouw antwoord

---

Selection bias - allocation concealment. Was there strict implementation of an allocation sequence without foreknowledge of intervention assignments?

Jouw antwoord

---



Performance/attrition/detection bias - blinding. Blinding of all outcomes?

Jouw antwoord

---

Incomplete outcome data?

Jouw antwoord

---

Measurement bias. Clear description of quantification method used and cut-off values?

Jouw antwoord

---

Summarized into high, low and unclear risk of bias \*

|                                                                                                                                                        | No - High risk of bias | Yes - Low risk of bias | Unclear               | Not applicable        |
|--------------------------------------------------------------------------------------------------------------------------------------------------------|------------------------|------------------------|-----------------------|-----------------------|
| Selection bias: adequate sequence generation? Did the study use a randomized sequence of assignments?                                                  | <input type="radio"/>  | <input type="radio"/>  | <input type="radio"/> | <input type="radio"/> |
| Selection bias: allocation concealment. Was there stricted implementation of an allocation sequence without foreknowlegde of intervention assignments? | <input type="radio"/>  | <input type="radio"/>  | <input type="radio"/> | <input type="radio"/> |
| Blinding?                                                                                                                                              | <input type="radio"/>  | <input type="radio"/>  | <input type="radio"/> | <input type="radio"/> |
| Incomplete outcome data addressed?                                                                                                                     | <input type="radio"/>  | <input type="radio"/>  | <input type="radio"/> | <input type="radio"/> |
| Measurement bias                                                                                                                                       | <input type="radio"/>  | <input type="radio"/>  | <input type="radio"/> | <input type="radio"/> |

## Appendix 7: Seroconversion rates per dose and per age

We tested whether the seroconversion rates after first and second MMR dose for measles, mumps and rubella were differ or not; and whether it depended on age of administration. Stratified by strain, studies investigated 51 of 69 seroconversion after the first MMR dose for measles, for mumps 46 of 62, leaving out Rubini strain, and 50 of 66. It was unclear from two studies which dose it investigated. Three studies<sup>10-12</sup> concerning seroconversion after a second MMR dose did not take into account the pre-vaccination serostatus of the participants, or it was not clear, thus were excluded from further meta-analysis. The meta-analysis estimates per MMR dose are displayed in **table S1**.

The age of administration ranges from 8 months to 44 years, a subdivision is made of age below 1, between 1 and 2 years; and above 2 years. The meta-analysis estimates for seroconversion per age and sample size (leaving out Rubini) in each group (below 1, between 1-2 and above 2 years) are displayed in **table S2**. There is no significant difference between the seroconversion rate per age group for measles, mumps and rubella ( $p= 0.379, 0.467$  and  $0.453$ , respectively)

We did not perform a subgroup analysis regarding the effect of age at vaccination on waning due to limited studies available.

**Table S1:** Overall seroconversion rates for measles, mumps and rubella per dose, stratified by strain, with 95% confidence interval.

|                | MMR1 (95% CI)    | MMR2 (95% CI)    |
|----------------|------------------|------------------|
| <b>Measles</b> | 96.2 (94.3-98.6) | 95.5 (91.2-98.7) |
| <b>Mumps</b>   | 93.1 (90.1-95.2) | 94.7 (89.5-98.9) |
| <b>Rubella</b> | 98.7 (97.6-99.5) | 96.1 (91.6-99.1) |

**Table S2:** Overall seroconversion rates for measles, mumps and rubella per age, stratified by strain, with 95% confidence interval and sample size per age group.

|                | Below 1 year (95% CI), N | Between 1 – 2 years (95% CI), N | Above 2 years (95% CI), N |
|----------------|--------------------------|---------------------------------|---------------------------|
| <b>Measles</b> | 91.5 (82.5-97.4), 4      | 96.1 (94.4-97.6), 52            | 96.6 (93.4-98.9), 17      |
| <b>Mumps</b>   | 96.6 (90.0-99.0), 5      | 92.9 (90.5-95.1), 46            | 94.9 (90.5-95.6), 14      |
| <b>Rubella</b> | 97.3 (89.9-99.7), 5      | 98.3 (97.0-99.3), 50            | 96.49 (93.5-99.2), 15     |

## Appendix 8: Seroconversion rates per different strain

Different strains for measles, mumps and rubella are used in the different MMR vaccines available on the market. Therefore, we performed a meta-analysis subgrouping the studies based on the measles and mumps strain types, but not for the rubella component as the majority of the studies used RA 27/3 (see appendix pp 11-12 for details).

The eligible studies for seroconversion included the Schwarz strain (used 27 times), Edmonston-Enders (19 times), Edmonston-Zagreb (16 times) and further seven measles strains. The seroconversion estimates per measles strain are displayed in **figure S9** (p 42). However, differences between measles strains were not significant ( $p = 0.602$ ).

Of the various attenuated mumps strains developed over the years the majority of the studies used the Jeryl Lynn mumps strain (23 times), followed by RIT 4385, derived from Jeryl Lynn (17 times), Urabe Am 9 (7 times), Leningrad-Zagreb (6 times), Rubini (5 times) Hoshino (4 times) and other four mumps strains. The rubella component in the majority of the MMR vaccines is the Wistar RA 27/3 strain in 58 studies while eight studies used other strains such as Cendehill, Takashi and BDRII. The seroconversion estimates per mumps strain are displayed in the main text (**figure 3**). Significant differences exist between mumps strains ( $p < 0.0001$ ), mainly due to Rubini. After excluding Rubini, the difference did not persist ( $p = 0.664$ ).

We did not perform a subgroup analysis to study differences in waning rates for the different strains as most of the eligible studies, except for two publications, used vaccines with the same measles and mumps strains.

## Appendix 9: Different estimators for $\tau^2$

Several estimators for the between-study variance component have been proposed whereof the DerSimonian and Laird (1986)<sup>5</sup> (DL) method is the most commonly implemented approach and default in many software programs. Veronike et al (2016)<sup>13</sup> have done a comprehensive overview of the different methods used for estimating the between-study variance and uncertainty. Here, we compared different estimators (DL, ML and REML) for the between-study variance (tables S3 and S4). Details for each estimator are described by Veronike and colleagues (2016)<sup>13</sup>. We found no substantial differences between the seroconversion rates and waning rates using different estimators for  $\tau^2$ .

**Table S3:** Overall seroconversion rates for measles, mumps and rubella using different estimators for between-study variance, with 95% confidence interval.

|                | DL (95% CI)      | ML (95% CI)      | REML (95% CI)    |
|----------------|------------------|------------------|------------------|
| <b>Measles</b> | 96.0 (94.5-97.4) | 96.0 (94.5-97.4) | 96.0 (94.5-97.4) |
| <b>Mumps</b>   | 93.3 (91.1-95.2) | 93.3 (91.2-95.2) | 93.3 (91.2-95.2) |
| <b>Rubella</b> | 98.3 (97.3-99.2) | 98.4 (97.2-99.2) | 98.4 (97.2-99.2) |

**Table S4:** Overall waning rates for measles, mumps and rubella using different estimators for between-study variance, with 95% confidence interval.

|                | Estimator for $\tau^2$ | Dose 1 (95% CI)     | Dose 2 (95% CI)     | Overall (95% CI)    |
|----------------|------------------------|---------------------|---------------------|---------------------|
| <b>Measles</b> | DL                     | 0.008 (0.002-0.024) | 0.009 (0.003-0.021) | 0.009 (0.005-0.016) |
|                | ML                     | 0.007 (0.002-0.023) | 0.009 (0.004-0.021) | 0.007 (0.004-0.015) |
|                | REML                   | 0.007 (0.002-0.023) | 0.009 (0.004-0.021) | 0.008 (0.003-0.015) |
| <b>Mumps</b>   | DL                     | 0.039 (0.028-0.056) | 0.016 (0.008-0.031) | 0.024 (0.016-0.039) |
|                | ML                     | 0.039 (0.028-0.056) | 0.016 (0.008-0.031) | 0.024 (0.016-0.039) |
|                | REML                   | 0.039 (0.028-0.056) | 0.015 (0.008-0.031) | 0.024 (0.016-0.038) |
| <b>Rubella</b> | DL                     | 0.014 (0.012-0.017) | 0.010 (0.009-0.012) | 0.012 (0.010-0.014) |
|                | ML                     | 0.014 (0.012-0.017) | 0.010 (0.008-0.012) | 0.012 (0.010-0.014) |
|                | REML                   | 0.014 (0.012-0.018) | 0.010 (0.008-0.012) | 0.012 (0.010-0.014) |

## Appendix 10: Seroconversion per test of detection

We tested whether the serological test used influences the seroconversion rate using a single mixed model with type of test as a covariate (see appendix pp 11-12 for details). We subdivided the test into ELISA and other tests because of the small sample size for the latter, ELISA being used to detect IgG antibody for measles 49 of 65 cases, for mumps 47 of 58, leaving out Rubini, cases and for rubella 45 of 62 cases. No significant difference between ELISA or other serological test was found for mumps ( $p=0.138$ ) rubella (0.742). We found a significant difference for measles ( $p = 0.043$ ). The overall seroconversion rates per test for measles, mumps and rubella are displayed in **table S5**.

**Table S5:** Overall seroconversion rates for measles, mumps and rubella, stratified per strain, subdividing by method of detection using a single fixed model, with 95% confidence interval.

|                | ELISA (95% CI)   | Other (95% CI)   |
|----------------|------------------|------------------|
| <b>Measles</b> | 96.8 (95.2-98.2) | 93.2 (89.4-96.3) |
| <b>Mumps</b>   | 94.1 (91.7-95.9) | 89.7 (83.2-94.8) |
| <b>Rubella</b> | 98.3 (96.9-99.3) | 98.6 (96.3-99.5) |

## Appendix 11: Seroconversion and persistence per region

We tested whether the region where the study was done, influences the seroconversion rate using a single mixed model with region as covariate (see appendix pp 11-12 for details). The meta-analysis estimates for seroconversion rates per region and sample size for measles, mumps (leaving out Rubini) and rubella (taking all strain together and; MMR1 and MMR2) are displayed in **table S6**. There is no significant difference between the seroconversion rate per age region for measles, mumps and rubella ( $p=0.899$ ,  $0.554$  and  $0.437$ , respectively).

We did not perform a subgroup analysis to study differences in waning rates for the different regions as most of them were conducted in Europe and a few in North America; and due to limited studies available.

**Table S6:** Overall seroconversion rates for measles, mumps and rubella per region using a single fixed model, with 95% confidence interval and sample size per region (N).

|                | <b>Europa</b><br>(95% CI), N | <b>Asia</b><br>(95% CI), N | <b>The Americas</b><br>(95% CI), N | <b>More than one region + Australia</b><br>(95% CI), N |
|----------------|------------------------------|----------------------------|------------------------------------|--------------------------------------------------------|
| <b>Measles</b> | 95.7 (91.7-98.6), 14         | 95.1 (91.1-97.9), 17       | 95.5 (91.1-98.6), 12               | 97.5 (90.4-100.0), 4                                   |
| <b>Mumps</b>   | 94.5 (90.4-97.6), 15         | 93.0 (88.5-96.6), 16       | 91.5 (85.4-96.2), 10               | 97.1 (89.5-100.0), 4                                   |
| <b>Rubella</b> | 98.7 (96.8-99.8), 15         | 97.6 (95.3-99.3), 16       | 96.9 (93.7-99.1), 10               | 99.8 (96.3-100.0), 4                                   |

## Appendix 12: Risk of bias assessment

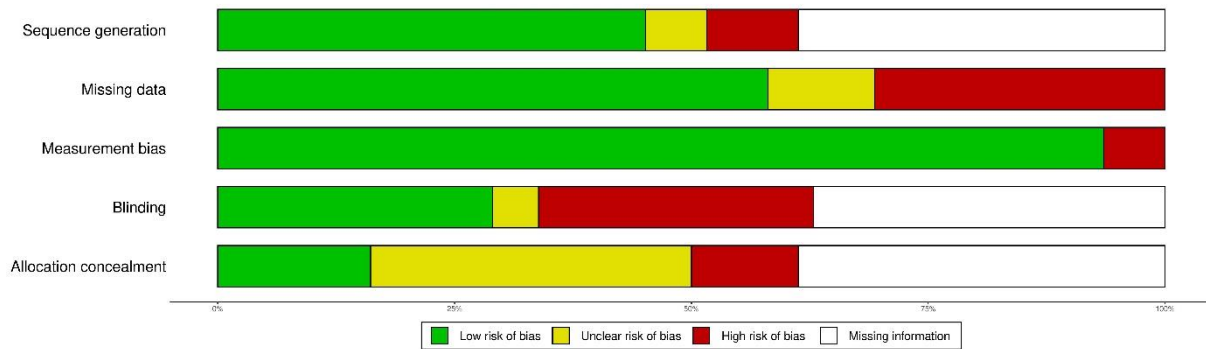

**Figure S5: Risk of assessment.** The proportion of all studies (n= 62) categorized to have high (red), low (green), unclear (yellow) risk of bias or not applicable (white) is plotted for each of the 5 categories: measurement bias, incomplete outcome data, blinding, allocation concealment and sequence generation based on the Higgins et al (2008)<sup>9</sup> risk assessment guideline.

**Table S7: Individual risk of bias assessment.** Red – High risk; Yellow – Unclear; Green – Low risk; blue – not applicable (NA).

| Author                                       | Sequence generation | Allocation concealment | Blinding | Missing data | Measurement bias |
|----------------------------------------------|---------------------|------------------------|----------|--------------|------------------|
| dos Santos et al (2019) <sup>21</sup>        | Low                 | Low                    | Low      | High         | Low              |
| Nakayama et al (2019) <sup>22</sup>          | Low                 | Low                    | High     | High         | Low              |
| The MMR-158 study group (2019) <sup>20</sup> | Low                 | Unclear                | Low      | High         | Low              |
| Carryn et al (2019) <sup>68</sup>            | Low                 | Unclear                | Low      | Unclear      | Low              |
| Abu-Elyazeed et al (2018) <sup>10</sup>      | Low                 | Low                    | Low      | Low          | Low              |
| Bavdekar et al (2018) <sup>24</sup>          | Low                 | Low                    | Low      | Low          | Low              |
| Joshi et al (2018) <sup>23</sup>             | Low                 | High                   | High     | Low          | Low              |
| Sood et al (2017) <sup>25</sup>              | Low                 | Low                    | High     | Low          | Low              |
| Wiedmann et al (2015) <sup>26</sup>          | Low                 | Unclear                | Low      | Low          | Low              |
| Diaz-Ortega et al (2014) <sup>11</sup>       | Low                 | Unclear                | Low      | Low          | Low              |
| He et al (2014) <sup>27</sup>                | Low                 | Low                    | High     | Low          | Low              |
| Prymula et al (2014) <sup>28</sup>           | Low                 | Low                    | Low      | Low          | Low              |
| Tabatabaei et al (2013) <sup>29</sup>        | NA                  | NA                     | NA       | Low          | High             |
| Poethko-Müller et al (2012) <sup>18</sup>    | NA                  | NA                     | NA       | Low          | Low              |
| Lee et al (2011) <sup>31</sup>               | High                | High                   | High     | Low          | Low              |
| Rumke et al (2011) <sup>33</sup>             | Low                 | High                   | High     | Low          | Low              |
| Saffar et al (2011) <sup>30</sup>            | NA                  | NA                     | NA       | High         | Low              |

|                                              |         |         |         |         |      |
|----------------------------------------------|---------|---------|---------|---------|------|
| Diaz Ortega et al (2010) <sup>34</sup>       | Low     | Unclear | Unclear | Unclear | Low  |
| Gomber et al (2010) <sup>32</sup>            | NA      | NA      | NA      | High    | Low  |
| LeBaron et al (2009a) <sup>69</sup>          | NA      | NA      | NA      | Low     | Low  |
| LeBaron et al (2009b) <sup>70</sup>          | NA      | NA      | NA      | Low     | Low  |
| Davidkin et al (2008) <sup>19</sup>          | NA      | NA      | NA      | High    | Low  |
| Khalil et al (2008) <sup>35</sup>            | NA      | NA      | NA      | High    | Low  |
| LeBaron et al (2007) <sup>71</sup>           | NA      | NA      | NA      | Low     | Low  |
| Lim et al (2007) <sup>37</sup>               | NA      | NA      | NA      | Low     | Low  |
| dos Santos et al (2006) <sup>38</sup>        | Low     | Unclear | Low     | Low     | Low  |
| Feiterna-Sperling et al (2005) <sup>39</sup> | Low     | Unclear | High    | Low     | Low  |
| Kremer et al (2005) <sup>72</sup>            | NA      | NA      | NA      | Low     | Low  |
| Redd et al (2004) <sup>40</sup>              | Low     | Low     | Low     | Low     | High |
| Yadav et al (2003) <sup>41</sup>             | NA      | NA      | NA      | High    | Low  |
| Lee et al (2002) <sup>42</sup>               | Unclear | Unclear | High    | Low     | Low  |
| Nolan et al (2002) <sup>44</sup>             | Low     | Unclear | High    | Unclear | Low  |
| Stuck et al (2002) <sup>43</sup>             | Low     | Unclear | High    | Low     | Low  |
| 208136/007 (2001) <sup>47</sup>              | Low     | Unclear | Unclear | Unclear | Low  |
| 208136/016 (2001) <sup>48</sup>              | Low     | Unclear | High    | Unclear | Low  |
| Ceyhan et al (2001) <sup>45</sup>            | High    | Unclear | High    | High    | Low  |
| Gothefors et al (2001) <sup>46</sup>         | Low     | Unclear | High    | Low     | Low  |
| Crovani et al (2000) <sup>50</sup>           | High    | Unclear | Low     | High    | Low  |
| Klinge et al (2000) <sup>49</sup>            | NA      | NA      | NA      | High    | Low  |
| Gatchalian et al (1999) <sup>52</sup>        | High    | Unclear | High    | High    | Low  |
| Khalil et al (1999) <sup>51</sup>            | Low     | Low     | High    | Unclear | Low  |
| Broliden et al (1998a) <sup>73</sup>         | NA      | NA      | NA      | Low     | Low  |
| Broliden et al (1998b) <sup>74</sup>         | NA      | NA      | NA      | Low     | Low  |
| Mitchell et al (1998) <sup>54</sup>          | NA      | NA      | NA      | High    | Low  |
| Schwarzer et al (1998) <sup>55</sup>         | Low     | High    | High    | High    | Low  |
| Usonis et al (1998) <sup>53</sup>            | Low     | High    | Low     | Low     | Low  |
| Forleo-Neto et al (1997) <sup>56</sup>       | NA      | NA      | NA      | High    | Low  |
| Mitchell et al (1996) <sup>12</sup>          | NA      | NA      | NA      | High    | Low  |
| Bhargava et al (1995) <sup>57</sup>          | NA      | NA      | NA      | Low     | Low  |
| Boulianne et al (1995) <sup>17</sup>         | NA      | NA      | NA      | Low     | Low  |
| Davidkin et al (1995) <sup>75</sup>          | NA      | NA      | NA      | Low     | Low  |
| Miller et al (1995) <sup>76</sup>            | NA      | NA      | Low     | Low     | Low  |
| Cohn et al (1994) <sup>58</sup>              | Unclear | Unclear | Low     | High    | Low  |
| Edees et al (1991) <sup>59</sup>             | Low     | Unclear | Low     | Low     | Low  |
| Dunlop et al (1989) <sup>60</sup>            | High    | High    | High    | Low     | High |



Robertson et al (1988)<sup>61</sup>

Böttiger et al (1987)<sup>62</sup>

Christenson et al (1983)<sup>63</sup>

Isozaki et al (1982)<sup>64</sup>

Lerman et al (1981)<sup>65</sup>

Bloom et al (1975)<sup>67</sup>

Ehrenkranz et al (1975)<sup>66</sup>

|         |         |         |         |     |
|---------|---------|---------|---------|-----|
| High    | High    | High    | Unclear | Low |
| NA      | NA      | NA      | Low     | Low |
| Unclear | Unclear | Unclear | Low     | Low |
| NA      | NA      | NA      | Low     | Low |
| Low     | Unclear | Low     | High    | Low |
| Unclear | Low     | Low     | High    | Low |
| Low     | Unclear | Low     | Low     | Low |

## Appendix 13: Publication bias

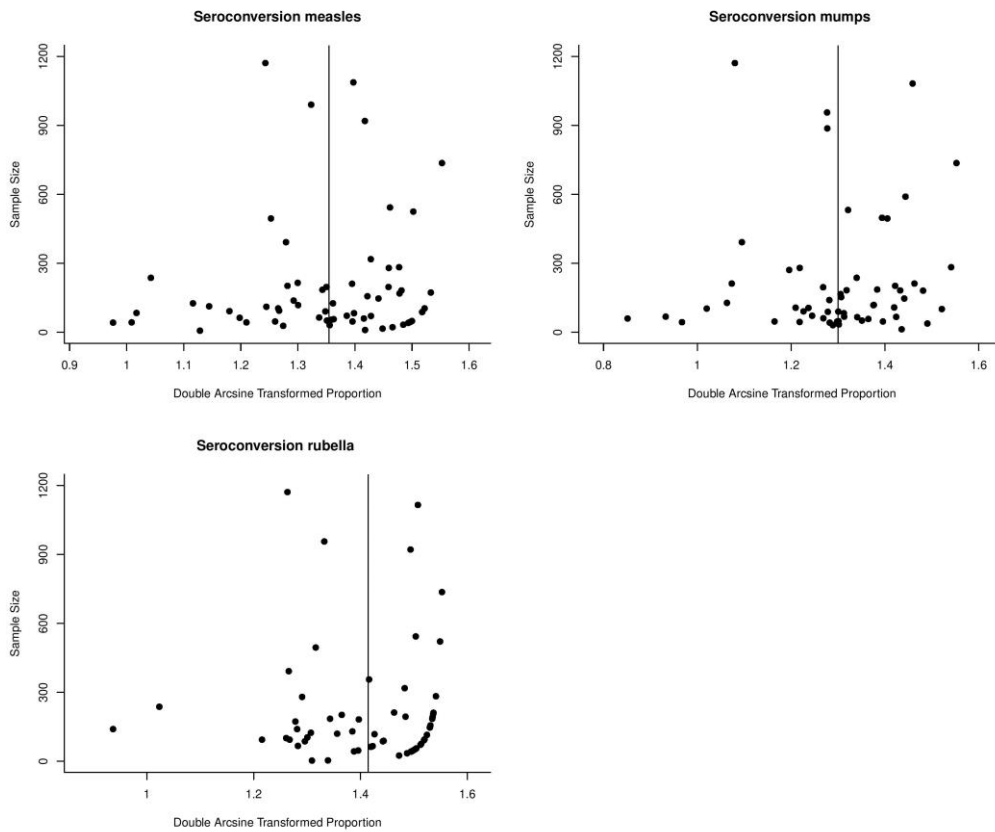

**Figure S6: Funnel plot.** Funnel plots of the double arcsine transformed proportion versus the sample size for the respective proportion for seroconversion rates of measles, mumps (leaving out Rubini) and rubella.

When combining proportions, it is recommended to plot the study size versus the logit transformed proportions.<sup>14</sup> The funnel plot in Figure S6 shows that there is asymmetry for seroconversion rate for measles, mumps and rubella as the dots are not symmetrically distributed on both sides of the combined effect line. However, when publication bias was tested in a formal way, using the test developed by Peters and colleagues (2006)<sup>15</sup>, we found no publication bias for seroconversion of measles ( $p=0.580$ ), mumps ( $0.274$ ) and rubella ( $0.861$ ).

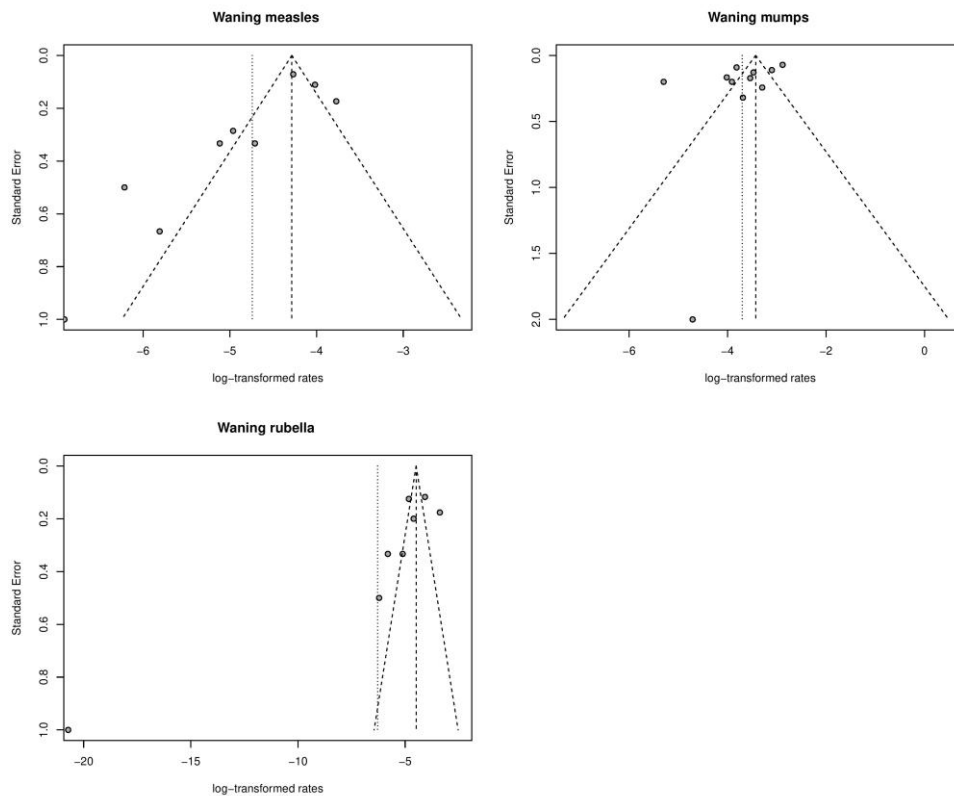

**Figure S7: Funnel plot.** Funnel plots of the log-transformed rates versus standard error for the respective rates for waning rates of measles, mumps and rubella.

The funnel plots for persistence studies for measles, mumps and rubella are displayed in Figure S7. The funnel plots for waning show asymmetry especially for measles and rubella. Publication bias is formally tested by the Egger's test<sup>16</sup>. Indeed, publication bias exist for the persistence studies concerning the measles component ( $p=0.013$ ), even when excluding studies with large sample size ( $p=0.033$ ). This was done merely to check whether these studies and the results therein altered the meta-analytic results/estimates drastically which it did not. There were more studies published demonstrating a low waning rate compared to studies that demonstrated a high waning rate.<sup>17,18</sup>

There is a gap between the persistence studies concerning the rubella component (Figure S7 lower left panel). This asymmetry is mainly due to one study<sup>19</sup> where there were no seronegative individuals for the rubella component after 20 years after second MMR dose but no publication exist for the persistence studies concerning the rubella component ( $p=0.056$ ).

The funnel plot for the persistence of the mumps component shows asymmetry duo to two studies<sup>68,69</sup> that have smaller waning rate compared to the others but when testing formally, no publication bias exist for the persistence studies concerning mumps ( $p=0.187$ ).

## Appendix 14: Supplementary tables

**Table S8:** Characteristics of included studies. Study concerning seroconversion or waning (sero/waning), average age at immunisation (Age), the administered vaccine (Vaccine), timepoints after vaccination at which blood samples are drawn (Time), type of study (Study design), country where study took place (Country). CT: clinical trial, RCT: randomised controlled trial, PC: prospective study, F: follow up study, R: review, RT: randomised trial.

|                                          | Sero or waning | Age          | Vaccine                                             | Route of Administration | Time        | Study design | Country                       |
|------------------------------------------|----------------|--------------|-----------------------------------------------------|-------------------------|-------------|--------------|-------------------------------|
| MMR-158 study group (2019) <sup>20</sup> | sero           | 4-6 yrs      | MMR II (Merck) / Priorix                            | s.c.                    | 42 d        | RCT          | US, South Korea, Taiwan       |
| dos Santos et al (2019) <sup>21</sup>    | sero           | 12-19 mon    | Priorix / NA                                        | s.c.                    | 42-60 d     | RT           | Brazil                        |
| Nakayama et al (2019) <sup>22</sup>      | sero           | 12-14 mon    | JCV-001                                             | s.c.                    | NA          | RCT          | Japan                         |
| Joshi et al (2018) <sup>23</sup>         | sero           | 15-18 mon    | Cadila MMR                                          | s.c.                    | 42 d        | CT           | US                            |
| Bavdekar et al (2018) <sup>24</sup>      | sero           | 15-18 mon    | MMR (SIPL)                                          | DSJI / N-S              | 35 d        | RT           | India                         |
| Abu-Elyazeed et al (2018) <sup>10</sup>  | sero           | ≥ 7 yrs      | Priorix / MMR-II (Merck)                            | NA                      | 42 d        | RCT          | US                            |
| Sood et al (2017) <sup>25</sup>          | sero           | 15-18 mon    | Cadila / Serum MMR (Serum Institute of India, Pune) | s.c.                    | 42 d        | RT           | India                         |
| Wiedmann et al (2015) <sup>26</sup>      | sero           | 11 to 19 mon | MMRII/(r)HA (Merck)                                 | s.c.                    | 6 wks       | CT           | US                            |
| He et al (2014) <sup>27</sup>            | sero           | 8/12 mon     | NA                                                  | s.c.                    | 30-35 d     | CT           | China                         |
| Diaz-ortega et al (2014) <sup>11</sup>   | sero           | 6-7 yrs      | Serum MMR / MMR-II (Merck)                          | NA                      | 4 wks       | CT           | Mexico                        |
| Prymnulla et al (2014) <sup>28</sup>     | sero           | 12-22 mon    | Priorix                                             | s.c.                    | 42 d        | RCT          | Europa                        |
| Tababtabaei et al (2013) <sup>29</sup>   | sero           | 12-15 mon    | MMR (Razi Institute)                                | NA                      | 4-7 wks     | PC           | Iran                          |
| Saffar et al (2011) <sup>30</sup>        | sero           | 1.5/4-6 yrs  | MMR (Razi Institute)                                | NA                      | 4-6 wks     | PC           | Iran                          |
| Lee et al (2011) <sup>31</sup>           | sero           | 12-23 mon    | Priorix / MMR-II (Merck)                            | NA                      | 5-8 wks     | CT           | Korea                         |
| Gomber et al (2011) <sup>32</sup>        | sero           | 4-6 yrs      | Tresivac                                            | s.c.                    | 4-6 wks     | PC           | India                         |
| Rumke et al (2011) <sup>33</sup>         | sero           | 11-13 mon    | NA                                                  | s.c.                    | 6 wks       | RT           | Germany, Belgium, Netherlands |
| Diaz-ortega et al (2010) <sup>34</sup>   | sero           | 18-25 yrs    | Triviraten/MMR-II (Merck)                           | Aerosol / s.c.          | 2 mon, 1 yr | RCT          | Mexico                        |

|                                              |      |                |                                            |             |            |     |                                                |
|----------------------------------------------|------|----------------|--------------------------------------------|-------------|------------|-----|------------------------------------------------|
| Khalil et al (2008) <sup>35</sup>            | sero | 12 mon         | NA                                         | NA          | 1 mon      | F   | Saudi Arabia                                   |
| Lim et al (2007) <sup>37</sup>               | sero | 12-18 mon      | Priorix                                    | s.c.        | 42 d       | CT  | Singapore                                      |
| Dos Santos et al (2006) <sup>38</sup>        | sero | 7-12 yrs       | Tresivac / MMR-II (Merck) / Trimovax       | s.c.        | 21-30 d    | RT  | Brazil                                         |
| Feiterna-Sperling et al (2005) <sup>39</sup> | sero | 12-24 mon      | MMR Berna / MMR-Vax                        | i.m.        | 6-8 wks    | RT  | Germany                                        |
| Redd et al (2004) <sup>40</sup>              | sero | 9/12/15 mon    | MMR-II (Merck)                             | NA          | 24 mon     | PC  | US                                             |
| Yavad et al (2003) <sup>41</sup>             | sero | 9-10/15-18 mon | Serum MMR (Serum Institute of India, Pune) | s.c.        | 6-8 wks    | PC  | India                                          |
| Lee et al (2002) <sup>42</sup>               | sero | 12-18 mon      | Priorix / MMR-II (Merck)                   | s.c.        | 40-63 ds   | CT  | Taiwan                                         |
| Stuck et al (2002) <sup>43</sup>             | sero | 12-24 mon      | Priorix / MMR-II (Merck) / Triviraten      | s.c.        | 60 d       | RCT | Germany                                        |
| Nolan et al (2002) <sup>44</sup>             | sero | 12 mon         | Priorix                                    | NA          | 60 d       | RCT | Australia                                      |
| Ceyhan et al, (2001) <sup>45</sup>           | sero | 12 mon         | Trimovax                                   | s.c.        | 6 wks      | PC  | Turkey                                         |
| Gothefors et al (2001) <sup>46</sup>         | sero | 11-12 yrs      | SB MMR (priorix) / MMR-II (Merck)          | NA          | 39-63 d    | RT  | Sweden                                         |
| 208136/016, (2001) <sup>47</sup>             | sero | 12-24 mon      | Priorix                                    | s.c.        | 42 d       | RCT | Belgium & Australia                            |
| 208136/007, (2001) <sup>48</sup>             | sero | 12-24 mon      | Priorix                                    | s.c.        | 42 d       | RCT | Australia & Canada & Italy & Colombia & Mexico |
| Klinge et al (2000) <sup>49</sup>            | sero | 9-17 mon       | MMR-Vax                                    | i.m. / s.c. | 4-6 wks    | PC  | Germany                                        |
| Crovani et al (2000) <sup>50</sup>           | sero | 12-27 mon      | Priorix / Triviraten                       | s.c.        | 60 d       | RT  | Italy                                          |
| Khalil et al (1999) <sup>51</sup>            | sero | 12 mon         | Triviraten/ MMR-II (Merck)                 | s.c.        | 8 wks      | CT  | Saudi Arabia                                   |
| Gatchalian et al (1999) <sup>52</sup>        | sero | 12-24 mon      | SB MMR (priorix) / MMR-II (Merck)          | s.c.        | 40-63 d    | RT  | Philippines                                    |
| Usonis et al (1999) <sup>53</sup>            | sero | 12-24 mon      | Priorix / MMR-II (Merck)                   | s.c.        | 42 d       | CT  | Lithuania                                      |
| Mitchell et al (1998) <sup>54</sup>          | sero | 12-24 mon      | MMR-II (Merck)                             | NA          | 1/3/12 mon | PC  | Canada                                         |
| Schwarzer et al (1998) <sup>55</sup>         | sero | 12-24 mon      | Triviraten / MMR-Vax                       | s.c.        | 6-9 wks    | RT  | Germany                                        |
| Forleo-Neto et al (1997) <sup>56</sup>       | sero | 9/15 mon       | Trimovax                                   | s.c.        | 6 wks      | PC  | Brazil                                         |
| Mitchell et al (1996) <sup>12</sup>          | sero | 17-44 yrs      | MMR-II (Merck)                             | NA          | 1 mon      | PC  | Canada                                         |
| Bhargava et al (1995) <sup>57</sup>          | sero | 15-24 mon      | NA                                         | NA          | 4 wks      | F   | India                                          |
| Cohn et al (1994) <sup>58</sup>              | sero | 10-30 yrs      | MMR-II (Merck)                             | NA          | 8 wks      | PC  | US                                             |
| Edees et al (1991) <sup>59</sup>             | sero | 13-15 mon      | Trimovax                                   | NA          | 6 wks      | C   | UK                                             |
| Dunlop et al (1989) <sup>60</sup>            | sero | 15 mon         | Trimovax                                   | s.c.        | 6 wks      | CT  | UK                                             |
| Robertson et al (1988) <sup>61</sup>         | sero | 13 mon         | NA                                         | NA          | 6 wks s    | CT  | UK                                             |

|                                           |        |                   |                                    |      |                              |     |                        |
|-------------------------------------------|--------|-------------------|------------------------------------|------|------------------------------|-----|------------------------|
| Bottiger et al (1987) <sup>62</sup>       | sero   | 18 mon/ 12 yrs    | MMR-II (Merck)                     | NA   | NA                           | PC  | Sweden                 |
| Christenson et al (1983) <sup>63</sup>    | sero   | 18 mon            | NA                                 | NA   | 2 mon & 1 yr                 | CT  | Sweden                 |
| Isozaki et al (1982) <sup>64</sup>        | sero   | 1-5 yrs           | NA                                 | NA   | 6 wks                        | C   | Japan                  |
| Lerman et al (1981) <sup>65</sup>         | sero   | 15 mon - 4 yrs    | MMR-II (Merck)                     | s.c. | 6 wks                        | RCT | US                     |
| Ehrenkranz et al (1975) <sup>66</sup>     | sero   | 1-7 yrs           | NA                                 | s.c. | 8 wks                        | RCT | Dominican Republic     |
| Bloom et al (1975) <sup>67</sup>          | sero   | 1-4 yrs           | NA                                 | s.c. | NA                           | RT  | US                     |
| Carryn et al (2019) <sup>68</sup>         | waning | 12-22 mon         | Priorix                            | s.c. | 1,2,4,6,8,10 yrs             | F   | 12 countries in Europe |
| Poethko-Muller et al (2012) <sup>18</sup> | waning | 0-17 yrs          | NA                                 | NA   | 0-2/ 3-6/ > 6 yrs            | F   | Germany                |
| LeBaron et al (2009a) <sup>69</sup>       | waning | 4-15 yrs          | MMR-II (Merck)                     | NA   | 1-6 mon & 2,5,7,10,12 yrs    | F   | US                     |
| LeBaron et al (2009b) <sup>70</sup>       | waning | 4-15 yrs          | MMR-II (Merck)                     | NA   | 1-6 months & 2,5,7,10,12 yrs | F   | US                     |
| Davidkin et al (2008) <sup>19</sup>       | waning | 14-18 mon / 6 yrs | MMR-II (Merck)                     | NA   | 1/8/15 yrs                   | F   | Finland                |
| LeBaron et al (2007) <sup>71</sup>        | waning | 4-15 yrs          | MMR-II (Merck)                     | NA   | 1-6 mon & 2,5,7,10,12 yrs    | F   | US                     |
| Kremer et al (2006) <sup>72</sup>         | waning | 12 yrs            | Pluserix / MMR-II (Merck)          | NA   | 2/9 & 10/17 yrs              | F   | Luxembourg             |
| Broliden et al (1998a) <sup>73</sup>      | waning | 12 yrs            | MMR-II (Merck)                     | NA   | NA                           | F   | Sweden                 |
| Broliden et al (1998b) <sup>74</sup>      | waning | 12 yrs            | MMR-II (Merck)                     | NA   | NA                           | F   | Sweden                 |
| Bouillianne et al (1995) <sup>17</sup>    | waning | 12-24 mon         | MMR-II (Merck) / Trivirix          | NA   | 6-7 yrs                      | RT  | Canada                 |
| Davidkin et al (1995) <sup>75</sup>       | waning | 14-18 mon / 6 yrs | MMR-II (Merck)                     | NA   | 3 mon & 1-6, 9 yrs           | F   | Finland                |
| Miller et al (1995) <sup>76</sup>         | waning | 12-18 mon         | MMR-II(Merck)/ Pluserix / Immravax | NA   | 4 yrs                        | F   | UK                     |

Sero or waning, study concerned seroconversion or waning; Age, average age at immunisation; Vaccine, administered vaccine; Route of administration, s.c. subcutaneous, i.m. intramuscular, DSJI/N-S disposable syringe jet injector versus needle-syringe; Time, timepoint(s) after vaccination when blood was drawn; Study design, CT: clinical trial, RCT: randomised controlled trial, PC: prospective study, F: follow up study, R: review, RT: randomised trial, Country, country(ies) where study took place. wks, weeks; mon, months; yrs, years.

**Table S9:** Characteristics of included seroconversion studies for measles component. Number of subjects involved in the study (N) together with number of positives (n), the measles strain used (Strain), the test used to quantify the antibody titre levels (Test), and cut-off based on which individuals are classified to be seropositive (Sero+), and dose of MMR (MMR dose). EZ, Edmonston-Zagreb; EE, Edmonston-Enders; S, Schwarz; O, Others; NT: neutralisation test; HI: hemoagglutination inhibition test; SN: serum neutralisation; IFA: immunofluorescent assay. Note that the number of strains is higher than the number of eligible studies because some studies considered more than one MMR vaccine.

|                                              | N    | n    | Strain  | Test  | Sero+        | MMR dose |
|----------------------------------------------|------|------|---------|-------|--------------|----------|
| MMR-158 study group (2019)* <sup>20</sup>    | 1019 | 1017 | S/O     | ELISA | ≥ 200 mIU/ml | MMR2     |
| dos Santos et al (2019) <sup>21</sup>        | 1563 | 1410 | S/NA    | ELISA | ≥ 321 mIU/ml | MMR1     |
| Nakayama et al (2019) <sup>22</sup>          | 49   | 49   | O       | NT    | titre ≥ 1:4  | MMR1     |
| Joshi et al (2018) <sup>23</sup>             | 22   | 22   | EZ      | ELISA | 200 mIU/ml   | MMR1     |
| Bavdekar et al (2018) <sup>24</sup>          | 111  | 105  | EZ      | ELISA | ≥ 1:10 ISR   | MMR1     |
| Abu-Elyazeed et al (2018)** <sup>10</sup>    | 869  | 861  | S/EE    | ELISA | ≥ 200 mIU/ml | MMR2     |
| Sood et al (2017) <sup>25</sup>              | 87   | 87   | EZ      | ELISA | 200mIU/ml    | MMR1     |
| Wiedmann et al (2015) <sup>26</sup>          | 1087 | 1055 | EE      | ELISA | ≥ 255 mIU/ml | MMR1     |
| He et al (2014) <sup>27</sup>                | 280  | 277  | Hu 191  | ELISA | ≥ 200 mIU/ml | MMR1     |
| Diaz-ortega et al (2014)** <sup>11</sup>     | 253  | 253  | S/EZ    | PRN   | ≥ 120 mIU/ml | MMR2     |
| Prymnlula et al (2014) <sup>28</sup>         | 919  | 898  | S       | ELISA | NA           | MMR1     |
| Tababtabaei et al (2013) <sup>29</sup>       | 237  | 177  | O       | ELISA | NA           | MMR1     |
| Saffar et al (2011) <sup>30</sup>            | 113  | 94   | O       | ELISA | ≥ 275 mIU/ml | MMR2     |
| Lee et al (2011) <sup>31</sup>               | 91   | 90   | S/EE    | ELISA | 150 mIU/ml   | MMR1     |
| Gomber et al (2011) <sup>32</sup>            | 66   | 43   | EZ      | ELISA | > 12 U/ml    | MMR2     |
| Rumke et al (2011) <sup>33</sup>             | 104  | 95   | S       | ELISA | 150 mIU/ml   | MMR1     |
| Diaz-ortega et al (2010) <sup>34</sup>       | 92   | 87   | S/EZ    | ELISA | ≥ 120 mIU/ml | MMR2     |
| Khalil et al (2008) <sup>35</sup>            | 57   | 55   | NA      | EIA   | > 0.200 OD   | MMR1     |
| Lim et al (2007) <sup>37</sup>               | 104  | 104  | S       | ELISA | 150 mIU/ml   | MMR1     |
| Dos Santos et al (2006) <sup>38</sup>        | 132  | 131  | S/EZ/EE | ELISA | NA           | MMR2     |
| Feiterna-Sperling et al (2005) <sup>39</sup> | 408  | 400  | EZ/EE   | ELISA | > 350 mIU/ml | MMR1     |
| Redd et al (2004) <sup>40</sup>              | 990  | 931  | EE      | EIA   | NA           | MMR1     |
| Yavad et al (2003) <sup>41</sup>             | 202  | 186  | NA      | ELISA | > 0.2 EU     | MMR1     |
| Lee et al (2002) <sup>42</sup>               | 49   | 49   | S/EE    | ELISA | 150 mIU/ml   | MMR1     |
| Stuck et al (2002) <sup>43</sup>             | 153  | 145  | S/EZ/EE | ELISA | > 150 mIU/ml | MMR1     |

|                                        |     |     |       |       |                                            |      |
|----------------------------------------|-----|-----|-------|-------|--------------------------------------------|------|
| Nolan et al (2002) <sup>77</sup>       | 72  | 70  | S     | ELISA | > 150 mIU/ml                               | MMR1 |
| Ceyhan et al, (2001) <sup>45</sup>     | 937 | 756 | S     | ELISA | 0.29 IU/ml                                 | MMR1 |
| Gothefors et al (2001) <sup>46</sup>   | 17  | 16  | S     | ELISA | NA                                         | MMR2 |
| 208136/016, (2001) <sup>47</sup>       | 63  | 55  | S     | ELISA | 150 mIU/ml                                 | MMR1 |
| 208136/007, (2001) <sup>48</sup>       | 543 | 537 | S     | ELISA | 150 mIU/ml                                 | MMR1 |
| Klinge et al (2000) <sup>49</sup>      | 118 | 110 | EE    | ELISA | ≥ 200 U/l                                  | MMR1 |
| Crovari et al (2000) <sup>50</sup>     | 682 | 677 | E/ES  | ELISA | 150 mIU/ml                                 | MMR1 |
| Khalil et al (1999) <sup>51</sup>      | 85  | 60  | EE/EZ | EIA   | > 300 mIU/ml                               | MMR1 |
| Gatchalian et al (1999) <sup>52</sup>  | 119 | 118 | S/EE  | ELISA | > 150<br>mIU/ml                            | MMR1 |
| Mitchell et al (1998) <sup>54</sup>    | 126 | 102 | O     | EIA   | EIA<br>absorbance<br>values ≥ 200<br>units | MMR1 |
| Schwarzer et al (1998) <sup>55</sup>   | 313 | 312 | EE/EZ | ELISA | 250 mIU/ml                                 | MMR1 |
| Usonis et al (1999) <sup>53</sup>      | 252 | 250 | S/EE  | ELISA | > 150<br>mIU/ml                            | MMR1 |
| Forleo-Neto et al (1997) <sup>56</sup> | 111 | 100 | S     | HI    | titers ≥ 1/10                              | MMR1 |
| Bhargava et al (1995) <sup>57</sup>    | 89  | 89  | EZ    | ELISA | NA                                         | MMR1 |
| Cohn et al (1994) <sup>58</sup>        | 43  | 38  | EE    | IFA   | > 12.0 titre                               | NA   |
| Edees et al (1991) <sup>59</sup>       | 138 | 128 | S     | HI    | > 20 titre                                 | MMR1 |
| Dunlop et al (1989) <sup>60</sup>      | 197 | 188 | S     | HI    | NA                                         | MMR1 |
| Robertson et al (1988) <sup>61</sup>   | 215 | 200 | S     | HI    | ≥ 20 titre                                 | MMR1 |
| Bottiger et al (1987) <sup>62</sup>    | 126 | 126 | EE    | HI    | NA                                         | MMR1 |
| Bottiger et al (1987) <sup>62</sup>    | 92  | 79  | EE    | HI    | NA                                         | MMR2 |
| Christenson et al (1983) <sup>63</sup> | 126 | 121 | M     | HI    | >10 tite                                   | MMR1 |
| Isozaki et al (1982) <sup>64</sup>     | 60  | 59  | O     | HI    | < 2 <sup>3</sup>                           | MMR1 |
| Lerman et al (1981) <sup>65</sup>      | 91  | 87  | EE    | HI    | NA                                         | MMR1 |
| Ehrenkranz et al (1975) <sup>66</sup>  | 71  | 70  | S     | HI    | titre ≥ 1/2                                | NA   |
| Bloom et al (1975) <sup>67</sup>       | 182 | 181 | S     | HI    | < 1:2                                      | MMR1 |

\*MMR2 study seroresponse rate defined as an IgG antibody concentration  $\geq 200$  mIU/ml for anti-measles but did not account for pre-vaccination concentrations since most of the participants were expected to be seroresponsive before there second dose of MMR vaccine.

\*\* MMR2 studies excluded from analysis because no clear proportion seronegative were mentioned.



**Table S10:** Characteristics of included seroconversion studies for mumps component. Number of subjects involved in the study (N) together with number of positives (n), the mumps strain used (Strain), the test used to quantify the antibody titre levels (Test), and cut-off based on which individuals are classified to be seropositive (Sero+), and dose of MMR (MMR dose). LZ: Leningrad-Zagreb; NT: neutralisation test; HI: hemoagglutination inhibition test; SN: serum neutralisation; IFA: immunofluorescent assay. Note that the number of strains is higher than the number of eligible studies because some studies considered more than one MMR vaccine.

|                                              | N    | n    | Strain                                        | Test  | Sero+         | MMR dose |
|----------------------------------------------|------|------|-----------------------------------------------|-------|---------------|----------|
| MMR-158 study group (2019)* <sup>20</sup>    | 1019 | 1019 | rit 4385/Jeryl Lynn                           | ELISA | ≥ 10 EU/ml    | MMR2     |
| dos Santos et al (2019) <sup>21</sup>        | 1563 | 1221 | rit 4385/NA                                   | ELISA | ≥ 457 U/ml    | MMR1     |
| Nakayama et al (2019) <sup>22</sup>          | 45   | 48   | rit 4385                                      | ELISA | NA            | MMR1     |
| Joshi et al (2018) <sup>23</sup>             | 101  | 101  | Hoshino                                       | ELISA | 8 EU/ml       | MMR1     |
| Bavdekar et al (2018) <sup>24</sup>          | 295  | 291  | Liningrad-Zagreb                              | ELISA | ≥ 1.10 ISR    | MMR1     |
| Abu-Elyazeed et al (2018)** <sup>10</sup>    | 869  | 860  | rit 4385/Jeryl Lynn                           | ELISA | ≥ 10 EU/ml    | MMR2     |
| Sood et al (2017) <sup>25</sup>              | 273  | 256  | Hoshino/LZ                                    | ELISA | 8 EU/ml       | MMR1     |
| Wiedmann et al (2015) <sup>26</sup>          | 1082 | 1069 | Jeryl Lynn                                    | ELISA | ≥ 10 U/ml     | MMR1     |
| He et al (2014) <sup>27</sup>                | 280  | 247  | S79                                           | ELISA | ≥ 100 U/ml    | MMR1     |
| Diaz-ortega et al (2014)** <sup>11</sup>     | 253  | 251  | Jeryl Lynn/LZ                                 | ELISA | ≥ 500 U/ml    | MMR2     |
| Prymnula et al (2014) <sup>28</sup>          | 887  | 813  | rit 4385                                      | ELISA | NA            | MMR1     |
| Tababtabaei et al (2013) <sup>29</sup>       | 237  | 225  | Hoshino                                       | ELISA | NA            | MMR1     |
| Saffar et al (2011) <sup>30</sup>            | 116  | 95   | Hoshino                                       | ELISA | ≥ 22 U/ml     | MMR2     |
| Lee et al (2011) <sup>31</sup>               | 92   | 80   | rit 4385/Jeryl Lynn                           | ELISA | 231 U/ml      | MMR1     |
| Gomber et al (2011) <sup>32</sup>            | 13   | 13   | liningrad-Zagreb                              | ELISA | > 12 U/ml     | MMR2     |
| Rumke et al (2011) <sup>33</sup>             | 103  | 75   | rit 4385                                      | ELISA | 231 U/ml      | MMR1     |
| Diaz-ortega et al (2010) <sup>34</sup>       | 222  | 125  | Rubini/Jeryl Lynn                             | ELISA | ≥ 100 U/ml    | MMR1     |
| Lim et al (2007) <sup>37</sup>               | 108  | 106  | rit 4385                                      | ELISA | 231 U/ml      | MMR1     |
| Dos Santos et al (2006) <sup>38</sup>        | 191  | 185  | Liningrad-Zagreb<br>/Jeryl Lynn/Urabe<br>am 9 | ELISA | NA            | MMR2     |
| Feiterna-Sperling et al (2005) <sup>39</sup> | 408  | 343  | Jeryl Lynn/Other                              | ELISA | > 1/500       | MMR1     |
| Redd et al (2004) <sup>40</sup>              | 956  | 876  | Jeryl Lynn                                    | ELISA | NA            | MMR1     |
| Yavad et al (2003) <sup>41</sup>             | 202  | 198  | Others                                        | ELISA | NA            | MMR1     |
| Lee et al (2002) <sup>42</sup>               | 200  | 189  | rit 4385/Jeryl Lynn                           | ELISA | 231<br>mIU/ml | MMR1     |
| Stuck et al (2002) <sup>43</sup>             | 154  | 103  | rit 4385/Jeryl<br>Lynn/Rubini                 | ELISA | > 231 U/ml    | MMR1     |
| Nolan et al (2002) <sup>77</sup>             | 119  | 115  | rit 4385                                      | ELISA | ≥ 231 U/ml    | MMR1     |

|                                        |     |     |                     |                            |                            |      |
|----------------------------------------|-----|-----|---------------------|----------------------------|----------------------------|------|
| Ceyhan et al, (2001) <sup>45</sup>     | 937 | 917 | Urabe am 9          | ELISA                      | 0.83 IU/ml                 | MMR1 |
| Gothefors et al (2001) <sup>46</sup>   | 69  | 67  | rit 4385/Jeryl Lynn | ELISA                      | NA                         | MMR2 |
| 208136/016, (2001) <sup>47</sup>       | 61  | 56  | rit 4385            | ELISA                      | 231 U/ml                   | MMR1 |
| 208136/007, (2001) <sup>48</sup>       | 532 | 500 | rit 4385            | ELISA                      | 231 U/ml                   | MMR1 |
| Klinge et al (2000) <sup>49</sup>      | 118 | 114 | Jeryl Lynn          | ELISA                      | ≥ 1: 200                   | MMR1 |
| Crovari et al (2000) <sup>50</sup>     | 645 | 535 | rit 4385/Rubini     | ELISA                      | 231 U/ml                   | MMR1 |
| Khalil et al (1999) <sup>51</sup>      | 85  | 49  | Rubini/Jeryl Lynn   | EIA                        | ≥ 1: 500 titres            | MMR1 |
| Gatchalian et al (1999) <sup>52</sup>  | 140 | 127 | rit 4385/Jeryl Lynn | ELISA                      | > 231 U/ml                 | MMR1 |
| Mitchell et al (1998) <sup>54</sup>    | 128 | 98  | Jeryl Lynn          | EIA                        | ≥ 200 units                | MMR1 |
| Schwarzer et al (1998) <sup>55</sup>   | 320 | 316 | Rubini/Jeryl Lynn   | ELISA                      | titer ≥500                 | MMR1 |
| Usonis et al (1999) <sup>53</sup>      | 249 | 233 | rit 4385/Jeryl Lynn | ELISA                      | > 231 U/ml                 | MMR1 |
| Forleo-Neto et al (1997) <sup>56</sup> | 181 | 180 | Urabe am 9          | NT                         | titers > 1/60              | MMR1 |
| Bhargava et al (1995) <sup>57</sup>    | 89  | 82  | Liningrad-Zagreb    | ELISA                      | NA                         | MMR1 |
| Edees et al (1991) <sup>59</sup>       | 107 | 94  | Urabe am 9          | NT                         | > 120 titre                | MMR1 |
| Dunlop et al (1989) <sup>60</sup>      | 186 | 180 | Urabe am 9          | ELISA                      | NA                         | MMR1 |
| Robertson et al (1988) <sup>61</sup>   | 212 | 210 | Urabe am 9          | ELISA                      | ≥ 160 titre                | MMR1 |
| Bottiger et al (1987) <sup>62</sup>    | 140 | 129 | Jeryl Lynn          | HI                         | NA                         | MMR1 |
| Bottiger et al (1987) <sup>62</sup>    | 131 | 106 | Jeryl Lynn          | HI                         | NA                         | MMR2 |
| Christenson et al (1983) <sup>63</sup> | 265 | 259 | Jeryl Lynn          | SN                         | >2 SN titre                | MMR1 |
| Isozaki et al (1982) <sup>64</sup>     | 60  | 34  | Urabe am 9          | NT                         | NT values < 2 <sup>2</sup> | MMR1 |
| Lerman et al (1981) <sup>65</sup>      | 91  | 81  | Jeryl Lynn          | IFA                        | NA                         | MMR1 |
| Ehrenkranz et al (1975) <sup>66</sup>  | 72  | 68  | Jeryl Lynn          | SN                         | SN titers ≥ 1:2            | NA   |
| Bloom et al (1975) <sup>67</sup>       | 182 | 179 | Jeryl Lynn          | vero cell microtiter serum | SN titer < 1:2             | MMR1 |

\*MMR2 study seroresponse rate defined as an IgG antibody concentration ≥ 10 EU/ml for anti-mumps but did not account for pre-vaccination concentrations since most of the participants were expected to be seroresponsive before their second dose of MMR vaccine. \*\* MMR2 studies excluded from analysis because no clear proportion seronegative were mentioned.

**Table S11:** Characteristics of included seroconversion studies for rubella component. Number of subjects involved in the study (N) together with number of positives (n), the rubella strain used (Strain), the test used to quantify the antibody titre levels (Test), and cut-off based on which individuals are classified to be seropositive (Sero+), and dose of MMR (MMR dose). NT: neutralisation test; HI: hemoagglutination inhibition test; SN: serum neutralisation; ISR: immune status ratio. Note that the number of strains is higher than the number of eligible studies because some studies considered more than one MMR vaccine.

|                                              | <b>N</b> | <b>n</b> | <b>Strain</b> | <b>Test</b> | <b>Sero+</b> | <b>MMR dose</b> |
|----------------------------------------------|----------|----------|---------------|-------------|--------------|-----------------|
| MMR-158 study group (2019)* <sup>20</sup>    | 1019     | 1019     | RA27/3        | ELISA       | ≥ 10 IU/ml   | MMR2            |
| dos Santos et al (2019) <sup>21</sup>        | 1563     | 1421     | RA27/3        | ELISA       | ≥ 10 IU/ml   | MMR1            |
| Nakayama et al (2019) <sup>22</sup>          | 49       | 49       | Takahashi     | HI          | titre ≥ 1:8  | MMR1            |
| Joshi et al (2018) <sup>23</sup>             | 86       | 87       | RA27/3        | ELISA       | 8 IU/m;      | MMR1            |
| Bavdekar et al (2018) <sup>24</sup>          | 305      | 303      | RA 27/3       | ELISA       | ≥ 1·10 ISR   | MMR1            |
| Abu-Elyazeed et al (2018)** <sup>10</sup>    | 869      | 866      | RA27/3        | ELISA       | ≥ 10 IU/ml   | MMR2            |
| Sood et al (2017) <sup>25</sup>              | 279      | 262      | RA27/3        | ELISA       | 8 IU/ml      | MMR1            |
| Wiedmann et al (2015) <sup>26</sup>          | 1115     | 1111     | RA27/3        | ELISA       | ≥ 10 IU/ml   | MMR1            |
| He et al (2014) <sup>27</sup>                | 280      | 259      | BDRII         | ELISA       | ≥ 20 IU/ml   | MMR1            |
| Diaz-ortega et al (2014)** <sup>11</sup>     | 253      | 253      | RA27/3        | ELISA       | ≥ 10 IU/ml   | MMR2            |
| Prymnlua et al (2014) <sup>28</sup>          | 921      | 916      | RA27/3        | ELISA       | NA           | MMR1            |
| Tababtabaei et al (2013) <sup>29</sup>       | 237      | 173      | Takahashi     | ELISA       | NA           | MMR1            |
| Saffar et al (2011) <sup>30</sup>            | 140      | 91       | Takahashi     | ELISA       | ≥ 11 IU/ml   | MMR2            |
| Lee et al (2011) <sup>31</sup>               | 91       | 91       | RA27/3        | ELISA       | 4UI/ml       | MMR1            |
| Gomber et al (2011) <sup>32</sup>            | 25       | 25       | RA27/3        | ELISA       | > 10 IU/ml   | MMR2            |
| Rumke et al (2011) <sup>33</sup>             | 104      | 97       | RA27/3        | ELISA       | 4UI/ml       | MMR1            |
| Diaz-ortega et al (2010) <sup>34</sup>       | 301      | 301      | RA27/3        | ELISA       | ≥ 10 IU/ml   | MMR2            |
| Lim et al (2007) <sup>37</sup>               | 115      | 115      | RA27/3        | ELISA       | 4 IU/ml      | MMR1            |
| Dos Santos et al (2006) <sup>38</sup>        | 282      | 256      | RA27/3        | ELISA       | NA           | MMR2            |
| Feiterna-Sperling et al (2005) <sup>39</sup> | 406      | 403      | RA27/3        | ELISA       | > 7 IU/ml    | MMR1            |
| Redd et al (2004) <sup>40</sup>              | 956      | 903      | RA27/3        | ELISA       | NA           | MMR1            |
| Yavad et al (2003) <sup>41</sup>             | 202      | 194      | RA27/3        | ELISA       | NA           | MMR1            |
| Lee et al (2002) <sup>42</sup>               | 202      | 202      | RA27/3        | ELISA       | 4 IU/ml      | MMR1            |
| Stuck et al (2002) <sup>43</sup>             | 154      | 153      | RA27/3        | ELISA       | > 4 IU/ml    | MMR1            |
| Nolan et al (2002) <sup>77</sup>             | 72       | 72       | RA27/3        | ELISA       | ≥ 4 IU/ml    | MMR1            |
| Ceyhan et al, (2001) <sup>45</sup>           | 937      | 885      | RA27/3        | ELISA       | 5.1 IU/ml    | MMR1            |
| Gothefors et al (2001) <sup>46</sup>         | 7        | 7        | RA27/3        | ELISA       | NA           | MMR2            |
| 208136/016, (2001) <sup>47</sup>             | 63       | 62       | RA27/3        | ELISA       | 4UI/ml       | MMR1            |

|                                        |     |     |                           |       |                           |      |
|----------------------------------------|-----|-----|---------------------------|-------|---------------------------|------|
| 208136/007, (2001) <sup>48</sup>       | 543 | 541 | RA27/3                    | ELISA | 4IU/ml                    | MMR1 |
| Klinge et al (2000) <sup>49</sup>      | 118 | 116 | RA27/3                    | ELISA | ≥ 10 U/ml                 | MMR1 |
| Crovani et al (2000) <sup>50</sup>     | 677 | 677 | RA27/3                    | ELISA | 4 IU/ml                   | MMR1 |
| Khalil et al (1999) <sup>51</sup>      | 85  | 84  | RA27/3                    | EIA   | ≥ 7 IU/ml                 | MMR1 |
| Gatchalian et al (1999) <sup>52</sup>  | 130 | 130 | RA27/3                    | ELISA | > 4 IU/ml                 | MMR1 |
| Mitchell et al (1998) <sup>54</sup>    | 124 | 116 | RA27/3                    | EIA   | ≥ 200 units               | MMR1 |
| Schwarzer et al (1998) <sup>55</sup>   | 320 | 316 | RA27/3                    | ELISA | > 8 IU/ml                 | MMR1 |
| Usonis et al (1999) <sup>53</sup>      | 228 | 228 | RA27/3                    | ELISA | > 4 IU/ml                 | MMR1 |
| Forleo-Neto et al (1997) <sup>56</sup> | 192 | 192 | RA27/3                    | HI    | titre ≥ 1/10              | MMR1 |
| Mitchell et al (1996)** <sup>12</sup>  | 356 | 348 | RA27/3                    | EIA   | 10 U/ml                   | MMR2 |
| Bhargava et al (1995) <sup>57</sup>    | 89  | 88  | RA27/3                    | ELISA | NA                        | MMR1 |
| Edees et al (1991) <sup>59</sup>       | 120 | 115 | RA27/3                    | HI    | > 20 titre                | MMR1 |
| Dunlop et al (1989) <sup>60</sup>      | 205 | 205 | RA27/3                    | HI    | NA                        | MMR1 |
| Robertson et al (1988) <sup>61</sup>   | 185 | 185 | RA27/3                    | HI    | ≥ 20 titre                | MMR1 |
| Bottiger et al (1987) <sup>62</sup>    | 130 | 129 | RA27/3                    | HI    | NA                        | MMR1 |
| Bottiger et al (1987) <sup>62</sup>    | 211 | 211 | RA27/3                    | HI    | NA                        | MMR2 |
| Christenson et al (1983) <sup>63</sup> | 140 | 129 | RA27/3                    | HIG   | >9 titre                  | MMR1 |
| Isozaki et al (1982) <sup>64</sup>     | 66  | 65  | rubella-<br>TO 336<br>001 | HI    | HI value < 2 <sup>3</sup> | MMR1 |
| Lerman et al (1981) <sup>65</sup>      | 91  | 91  | RA27/3                    | HI    | NA                        | MMR1 |
| Ehrenkranz et al (1975) <sup>66</sup>  | 67  | 62  | Cendehill                 | HI    | titre ≥ 1:8               | NA   |
| Bloom et al (1975) <sup>67</sup>       | 182 | 177 | Cendehill                 | HI    | HI value < 1:8            | MMR1 |

\*MMR2 study seroresponse rate defined as an IgG antibody concentration ≥ 10 IU/ml for anti-rubella but did not account for pre-vaccination concentrations since most of the participants were expected to be seroresponsive before their second dose of MMR vaccine.

\*\* MMR2 studies excluded from analysis because no clear proportion seronegative were mentioned.

**Table S12:** Characteristics of included waning studies for measles component. Number of subjects involved (N) together with number of positives (n) at the different time points a blood sample was taken, which MMR dose, strain, the retrieved waning rate (rate) , and the used method. EE: Edmonston-Enders; S: Schwarz.

|                                           | n    | N    | Time points blood sample (years) | MMR dose | Strain | Rate, 95% CI         | Method             |
|-------------------------------------------|------|------|----------------------------------|----------|--------|----------------------|--------------------|
| Carryn et al (2019) <sup>68</sup>         | 231  | 232  | 0                                | 1        | S      | 0.007 (0.003-0.011)  | gee                |
|                                           | 230  | 232  | 1                                | 1        |        |                      |                    |
|                                           | 227  | 232  | 2                                | 1        |        |                      |                    |
|                                           | 222  | 232  | 4                                | 1        |        |                      |                    |
|                                           | 217  | 232  | 6                                | 1        |        |                      |                    |
|                                           | 220  | 232  | 8                                | 1        |        |                      |                    |
|                                           | 219  | 232  | 10                               | 1        |        |                      |                    |
| Poethko-Muller et al (2012) <sup>18</sup> | 1876 | 2000 | 1                                | 1        | NA     | 0.018 (0.015-0.022)  | glm                |
|                                           | 1846 | 2000 | 4.5                              | 1        |        |                      |                    |
|                                           | 1886 | 2000 | 6                                | 1        |        |                      |                    |
|                                           | 1949 | 2000 | 1                                | 2        |        | 0.014 (0.012-0.016)  | glm                |
|                                           | 1901 | 2000 | 4.5                              | 2        |        |                      |                    |
|                                           | 1853 | 2000 | 6                                | 2        |        |                      |                    |
| Davidkin et al (2008) <sup>19</sup>       | 81   | 85   | 15                               | 2        | EE     | 0.003 (0.0008-0.008) | empirical estimate |
| Kremer et al (2006) <sup>72*</sup>        | 44   | 47   | 10                               | 1        | EE     | 0.007 (0.002-0.011)  |                    |
|                                           | 42   | 47   | 17                               | 1        |        |                      |                    |
|                                           | 36   | 38   | 2                                | 2        |        | 0.018 (0.005-0.031)  |                    |
|                                           | 33   | 38   | 9                                | 2        |        |                      |                    |
| LeBaron et al (2007) <sup>71</sup>        | 309  | 312  | 4.5                              | 1        | EE     | 0.002 (0.0004-0.006) | empirical estimate |
|                                           | 304  | 304  | 0.08                             | 1        | EE     | 0.006 (0.002-0.007)  | gee                |
|                                           | 302  | 302  | 0.5                              | 1        |        |                      |                    |
|                                           | 243  | 243  | 2                                | 1        |        |                      |                    |
|                                           | 173  | 174  | 5                                | 1        |        |                      |                    |
|                                           | 160  | 161  | 7                                | 1        |        |                      |                    |
|                                           | 145  | 154  | 10                               | 1        |        |                      |                    |
|                                           | 307  | 308  | 0.08                             | 2        | EE     | 0.009 (0.002-0.015)  | gee                |
|                                           | 304  | 306  | 0.5                              | 2        |        |                      |                    |
|                                           | 256  | 266  | 2                                | 2        |        |                      |                    |
|                                           | 201  | 210  | 5                                | 2        |        |                      |                    |

|                                          |     |     |     |   |      |                      |                    |
|------------------------------------------|-----|-----|-----|---|------|----------------------|--------------------|
| Broliden et al<br>(1998b) <sup>74</sup>  | 373 | 378 | 10  | 1 | EE   | 0.001 (0.0004-0.003) | empirical estimate |
| Bouilianne et al<br>(1995) <sup>17</sup> | 212 | 241 | 5.5 | 1 | EE   | 0.023 (0.016-0.033)  | empirical estimate |
| Miller et al (1995) <sup>76</sup>        | 462 | 475 | 4   | 1 | S/EE | 0.007 (0.003-0.018)  | empirical estimate |

\*Not included in meta-analysis because N is less than 50 (exclusion criteria stated in protocol)

**Table S13:** Characteristics of included waning studies for mumps component. Number of subjects involved (N) together with number of positives (n) at the different time points a blood sample was taken, which MMR dose, strain, the retrieved waning rate (rate) , and the used method.

|                                           | n    | N    | Time points blood sample (years) | MMR dose | Strain     | Rate, 95% CI        | Method             |
|-------------------------------------------|------|------|----------------------------------|----------|------------|---------------------|--------------------|
| Carryn et al (2019) <sup>68</sup>         | 232  | 232  | 0                                | 1        | rit 4385   | 0.005 (0.002-0.007) | gee                |
|                                           | 216  | 232  | 1                                | 1        |            |                     |                    |
|                                           | 212  | 232  | 2                                | 1        |            |                     |                    |
|                                           | 210  | 232  | 4                                | 1        |            |                     |                    |
|                                           | 223  | 232  | 6                                | 1        |            |                     |                    |
|                                           | 214  | 232  | 8                                | 1        |            |                     |                    |
|                                           | 218  | 232  | 10                               | 1        |            |                     |                    |
| Poethko-Muller et al (2012) <sup>18</sup> | 1664 | 2000 | 1                                | 1        | NA         | 0.056 (0.05-0.063)  | glm                |
|                                           | 1572 | 2000 | 4-5                              | 1        |            |                     |                    |
|                                           | 1627 | 2000 | 6                                | 1        |            |                     |                    |
|                                           | 1897 | 2000 | 1                                | 2        | NA         | 0.022 (0.019-0.025) | glm                |
|                                           | 1821 | 2000 | 4-5                              | 2        |            |                     |                    |
|                                           | 1824 | 2000 | 6                                | 2        |            |                     |                    |
| LeBaron et al (2009a) <sup>69</sup>       | 149  | 154  | 0-5                              | 2        | Jeryl Lynn | 0.009 (0.004-0.014) | gee                |
|                                           | 148  | 154  | 2                                | 2        |            |                     |                    |
|                                           | 148  | 154  | 5                                | 2        |            |                     |                    |
|                                           | 136  | 154  | 7                                | 2        |            |                     |                    |
|                                           | 137  | 154  | 10                               | 2        |            |                     |                    |
|                                           | 136  | 154  | 12                               | 2        |            |                     |                    |
|                                           | 180  | 189  | 0-5                              | 2        | Jeryl Lynn | 0.018 (0.012-0.025) | gee                |
|                                           | 178  | 189  | 2                                | 2        |            |                     |                    |
|                                           | 178  | 189  | 5                                | 2        |            |                     |                    |
|                                           | 151  | 189  | 7                                | 2        |            |                     |                    |
| Davidkin et al (2008) <sup>19</sup>       | 65   | 90   | 15                               | 2        | Jeryl Lynn | 0.020 (0.012-0.028) | empirical estimate |
| Broliden et al (1998a) <sup>73</sup>      | 168  | 229  | 10                               | 1        | Jeryl Lynn | 0.031 (0.024-0.040) | empirical estimate |
| Davidkin et al (1995) <sup>75</sup>       | 103  | 120  | 0                                | 1        | Jeryl Lynn | 0.037 (0.019-0.054) | gee                |

|                                      |     |     |     |   |                        |                     |                    |
|--------------------------------------|-----|-----|-----|---|------------------------|---------------------|--------------------|
|                                      | 88  | 120 | 1   | 1 |                        |                     |                    |
|                                      | 94  | 120 | 2   | 1 |                        |                     |                    |
|                                      | 82  | 120 | 3   | 1 |                        |                     |                    |
|                                      | 91  | 120 | 4   | 1 |                        |                     |                    |
|                                      | 114 | 120 | 0   | 2 | Jeryl Lynn             | 0.025 (0.010-0.040) | gee                |
|                                      | 110 | 120 | 1   | 2 |                        |                     |                    |
|                                      | 103 | 120 | 4   | 2 |                        |                     |                    |
| Miller et al (1995) <sup>76</sup>    | 392 | 470 | 4   | 1 | Urabe 9 am/ Jeryl Lynn | 0.045 (0.035-0.055) | empirical estimate |
| Boulianne et al (1995) <sup>17</sup> | 205 | 241 | 5.5 | 1 | Jeryl Lynn             | 0.029 (0.021-0.041) | empirical estimate |



**Table S14:** Characteristics of included waning studies for rubella component. Number of subjects involved (N) together with number of positives (n) at the different time points a blood sample was taken, which MMR dose, strain, the retrieved waning rate (rate), and the used method.

|                                           | n    | N    | Time points blood sample (years) | MMR dose | Strain | Rate, 95% CI         | Method             |
|-------------------------------------------|------|------|----------------------------------|----------|--------|----------------------|--------------------|
| Carryn et al (2019) <sup>68</sup>         | 230  | 232  | 1                                | 1        | RA27/3 | 0.003 (0.0007-0.006) | gee                |
|                                           | 231  | 232  | 2                                | 1        |        |                      |                    |
|                                           | 231  | 232  | 4                                | 1        |        |                      |                    |
|                                           | 230  | 232  | 6                                | 1        |        |                      |                    |
|                                           | 226  | 232  | 8                                | 1        |        |                      |                    |
|                                           | 224  | 232  | 10                               | 1        |        |                      |                    |
| Poethko-Muller et al (2012) <sup>18</sup> | 1922 | 2000 | 1                                | 1        | RA27/3 | 0.017 (0.014-0.020)  | glm                |
|                                           | 1897 | 2000 | 4.5                              | 1        |        |                      |                    |
|                                           | 1833 | 2000 | 6                                | 1        |        |                      |                    |
|                                           | 1980 | 2000 | 1                                | 2        | RA27/3 | 0.008 (0.006-0.010)  | glm                |
|                                           | 1923 | 2000 | 4.5                              | 2        |        |                      |                    |
|                                           | 1930 | 2000 | 6                                | 2        |        |                      |                    |
| LeBaron et al (2009b) <sup>70</sup>       | 143  | 144  | 0.5                              | 1        | RA27/3 | 0.010 (0.006-0.014)  | gee                |
|                                           | 127  | 144  | 2                                | 1        |        |                      |                    |
|                                           | 130  | 144  | 7                                | 1        |        |                      |                    |
|                                           | 122  | 144  | 10                               | 1        |        |                      |                    |
|                                           | 128  | 144  | 12                               | 1        |        |                      |                    |
|                                           | 185  | 189  | 0.5                              | 2        | RA27/3 | 0.034 (0.022-0.046)  | gee                |
|                                           | 166  | 189  | 2                                | 2        |        |                      |                    |
|                                           | 151  | 189  | 7                                | 2        |        |                      |                    |
| Davidkin et al (2008) <sup>19</sup>       | 90   | 90   | 15                               | 2        | RA27/3 | 0.000 (0.000-0.000)  | empirical estimate |
| Miller et al (1995) <sup>76</sup>         | 471  | 475  | 4                                | 1        | RA27/3 | 0.002 (0.000-0.003)  | empirical estimate |
| Bouillianne et al (1995) <sup>17</sup>    | 233  | 241  | 5.5                              | 1        | RA27/3 | 0.006 (0.002-0.010)  | empirical estimate |

## Appendix 15: Supplementary figures

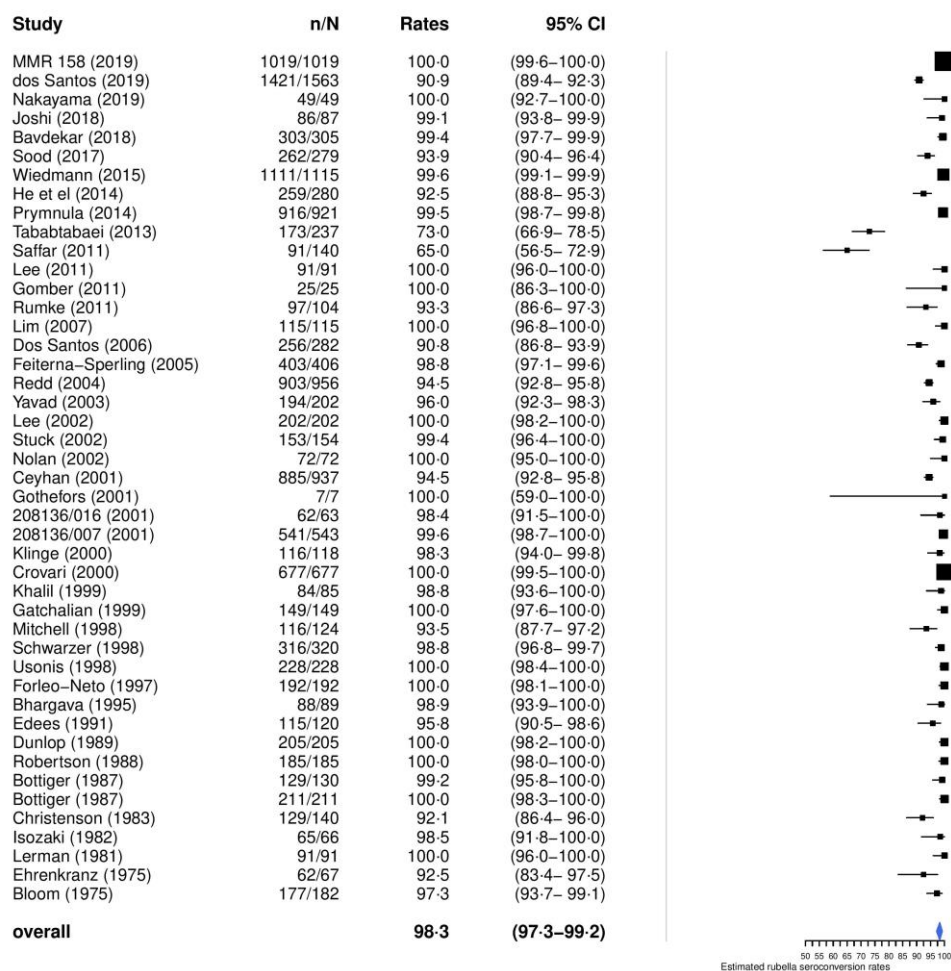

**Figure S8: Forest plot of the seroconversion rate for rubella.** The overall seroconversion rate estimate was obtained from a meta-analysis random effects model with the DerSimonian-Laird estimator.  $I^2 = 93.0\%$  (95% CI 89.1, 94.8). The 95% confidence intervals (CI) for the individual studies were Clopper-Pearson exact intervals. Abbreviations: n, number of seropositive; N, total number.

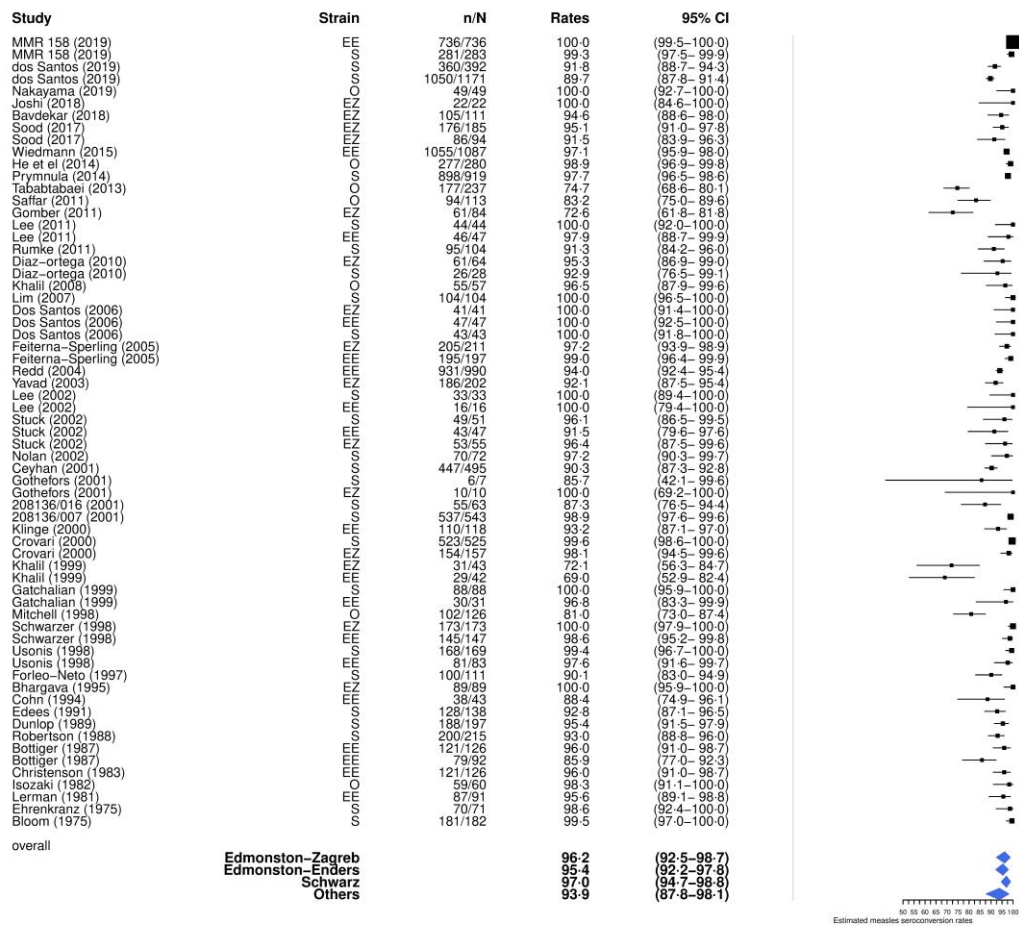

**Figure S9: Forest plot of the seroconversion rate for measles per strain.** The overall seroconversion rate estimate per strain was obtained from a single mixed model, strain as fixed effect, with the DerSimonian-Laird estimator.  $I^2 = 91.2\%$  (95% CI 89.3, 94.9). The 95% confidence intervals (CI) for the individual studies were Clopper-Pearson exact intervals. Abbreviations: n, number of seropositive; N, total number; EZ, Edmonston-Zagreb; EE, Edmonston-Enders; S, Schwarz; O, Others.

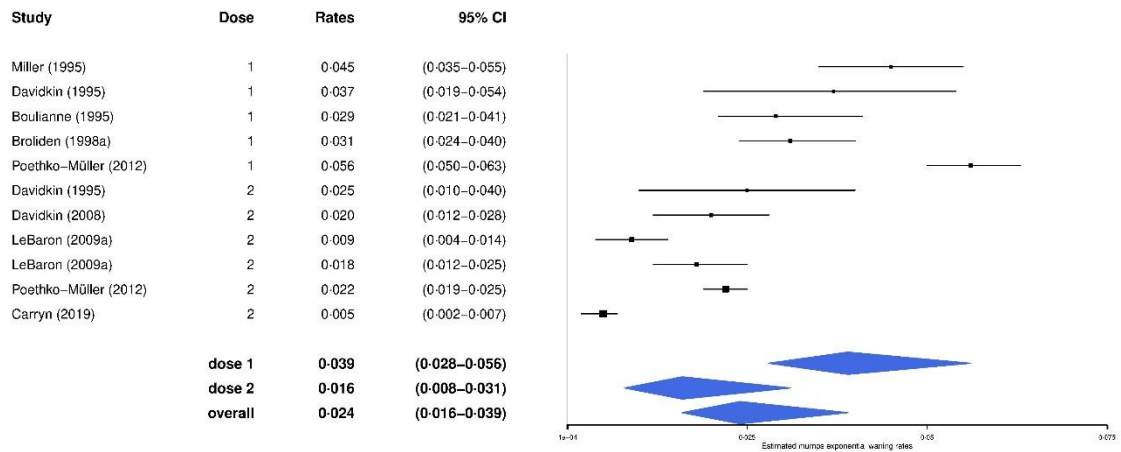

**Figure S10: Forest plot of the waning rate for mumps.** The waning rate estimates for dose 1, 2 and both combined for mumps was obtained from a meta-analysis random effect model, with DerSimonian-Laird estimator.  $I^2 = 94.7\%$  (95% CI 92.4–96.5) for both doses combined.

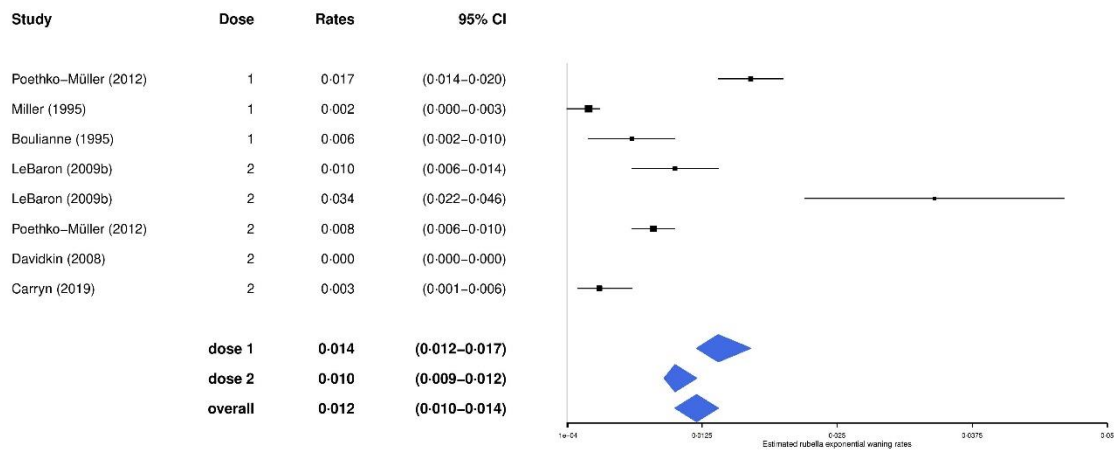

**Figure S11: Forest plot of the waning rate for rubella.** The waning rate estimates for dose 1, 2 and both combined for rubella was obtained from a meta-analysis fixed effect model, with DerSimonian-Laird estimator.  $I^2 = 93.3\%$  (95% CI 88.6-96.0) for both doses combined.

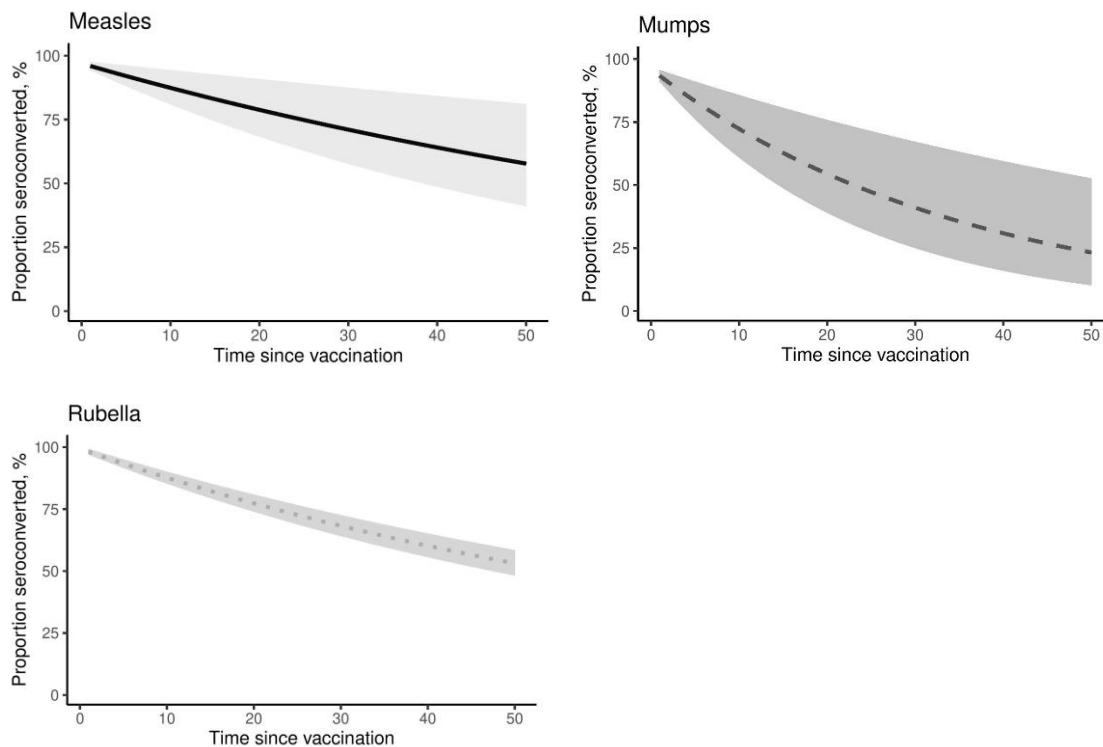

**Figure S12: Loss of vaccine-induced immunity over time based on the overall meta-analysis results: simulated evolution of the proportion seroconverted for persons vaccinated in year 0 against measles, mumps and rubella with a single dose of MMR vaccine.** The full, dashed and dotted lines are corresponding to measles, mumps and rubella. The shaded areas are the 95% bootstrap confidence intervals.

**Figure S12** is a simple hypothetical projection based on the overall meta-analysis results to display how the proportion seroconverted in a group of 100 vaccinated individuals would evolve over a time span of 50 years, with a single dose of MMR vaccine and no exposure to wild types viruses at any time after vaccination. For example, 35 years after vaccination, about 30% ( $= [1 - (0 \cdot 960 * e^{(-0 \cdot 009 * 35)})] * 100\%$ ) (95% CI: 14·2-46·1) of individuals became seronegative for measles, with 96·0% the overall seroconversion rate for measles after an MMR dose and 0·009 the overall annual waning rate for vaccine-induced measles immunity.

## REFERENCES

1. Abrams S, Beutels P, Hens N. Assessing mumps outbreak risk in highly vaccinated populations using spatial seroprevalence data. *American journal of epidemiology* 2014; **179**(8): 1006-17.
2. Schenk J. Immunogenicity and persistence of measles, mumps and rubella vaccines: a systematic review and meta-analysis. 2019.  
[http://www.crd.york.ac.uk/PROSPERO/display\\_record.asp?ID=CRD42019116705](http://www.crd.york.ac.uk/PROSPERO/display_record.asp?ID=CRD42019116705)
3. Freeman MF, Tukey JW. Transformations related to the angular and the square root. *The Annals of Mathematical Statistics* 1950: 607-11.
4. DerSimonian R, Kacker R. Random-effects model for meta-analysis of clinical trials: an update. *Contemporary clinical trials* 2007; **28**(2): 105-14.
5. DerSimonian R, Laird N. Meta-analysis in clinical trials. *Controlled clinical trials* 1986; **7**(3): 177-88.
6. Knapp G, Hartung J. Improved tests for a random effects meta - regression with a single covariate. *Statistics in medicine* 2003; **22**(17): 2693-710.
7. Higgins JPT, Thompson SG, Deeks JJ, Altman DG. Measuring inconsistency in meta-analyses. *Bmj* 2003; **327**(7414): 557-60.
8. Viechtbauer W. Conducting meta-analyses in R with the metafor package. *Journal of statistical software* 2010; **36**(3): 1-48.
9. Higgins J, Altman DG. Assessing Risk of Bias in Included Studies. . Cochrane handbook for systematic reviews of interventions. Chichester Wiley 2008.
10. Abu-Elyazeed RJ, W.; Severance, R.; Noss, M.; Caplanusi, A.; Povey, M.; Henry, O. Immunogenicity and safety of a second dose of a measles-mumps-rubella vaccine administered to healthy participants 7 years of age or older: a phase III, randomized study. *Hum Vaccin Immunother* 2018: 1-32.
11. Diaz-Ortega JLB, J. V.; Castaneda-Desales, D.; Quintanilla, D. M.; Martinez, D.; de Castro, J. F. Booster immune response in children 6-7 years of age, randomly assigned to four groups with two MMR vaccines applied by aerosol or by injection. *Vaccine* 2014; **32**(29): 3680-6.

12. Mitchell LAH, M. K. L.; Rogers, J. E.; Tingle, A. J.; Marusyk, R. G.; Weber, J. M.; Duclos, P.; Tepper, M. L.; Lacroix, M.; Zrein, M. Rubella reimmunization: Comparative analysis of the immunoglobulin G response to rubella virus vaccine in previously seronegative and seropositive individuals. *Journal of clinical microbiology* 1996; **34**(9): 2210-8.
13. Veroniki AA, Jackson D, Viechtbauer W, et al. Methods to estimate the between - study variance and its uncertainty in meta - analysis. *Research synthesis methods* 2016; **7**(1): 55-79.
14. Hunter JP, Saratzis A, Sutton AJ, Boucher RH, Sayers RD, Bown MJ. In meta-analyses of proportion studies, funnel plots were found to be an inaccurate method of assessing publication bias. *Journal of clinical epidemiology* 2014; **67**(8): 897-903.
15. Peters JL, Sutton AJ, Jones DR, Abrams KR, Rushton L. Comparison of two methods to detect publication bias in meta-analysis. *JAMA* 2006; **295**(6): 676-80.
16. Egger M, Davey Smith G, Schneider M, Minder C. Bias in meta-analysis detected by a simple, graphical test. *BMJ* 1997; **315**(7109): 629-34.
17. Boulianne N, De Serres G, Ratnam S, Ward BJ, Joly JR, Duval B. Measles, mumps, and rubella antibodies in children 5–6 years after immunization: effect of vaccine type and age at vaccination. *Vaccine* 1995; **13**(16): 1611-6.
18. Poethko-Muller CM, A. Seroprevalence of measles-, mumps- and rubella-specific IgG antibodies in German children and adolescents and predictors for seronegativity. *PLoS One* 2012; **7**(8): e42867.
19. Davidkin IJ, S.; Broman, M.; Leinikki, P.; Peltola, H. Persistence of measles, mumps, and rubella antibodies in an MMR-vaccinated cohort: a 20-year follow-up. *J Infect Dis* 2008; **197**(7): 950-6.
20. A second dose of a measles-mumps-rubella vaccine administered to healthy four-to-six-year-old children: a phase III, observer-blind, randomized, safety and immunogenicity study comparing GSK MMR and MMR II with and without DTaP-IPV and varicella vaccines co-administration. *Human vaccines & immunotherapeutics* 2019; **15**(4): 786-99.
21. Santos EMDN, T. G.; Alves, I. S.; Cruz, R. L. S.; Ferroco, C. L. V.; Brum, R. C.; Oliveira, P. M. N.; Siqueira, M. M.; Lima, M. C.; Ramos, F. L. P.; Bragagnolo, C. M.; Camacho, L. A. B.;



- Maia, M. L. S. Immunogenicity and safety of the combined vaccine for measles, mumps, and rubella isolated or combined with the varicella component administered at 3-month intervals: randomised study. *Memorias do Instituto Oswaldo Cruz* 2019; **114**: e180517.
22. Nakayama TE, M.; Hirano, M.; Goto, W. Immunogenicity and safety of the new MMR vaccine containing measles AIK-C, rubella Takahashi, and mumps RIT4385 strains in Japanese children: a randomized phase I/II clinical trial. *Human vaccines & immunotherapeutics* 2019; **15**(5): 1139-44.
23. Joshi RH, N.; Nayak, U.; Agarkhedkar, S.; Thakkar, P.; Sanmukhani, J.; Mittal, R. Immunogenicity and Safety of a Novel MMR Vaccine (Live) (Freeze-dried): Results of a Phase II Clinical Trial. *J Clin Diagn Res* 2018; **12**(1): SC9-SC13.
24. Bavdekar AO, J.; Ramanan, P. V.; Aundhkar, C.; Venugopal, P.; Kapse, D.; Miller, T.; McGray, S.; Zehring, D.; Kulkarni, P. S.; Sii Mmr author group. Immunogenicity and safety of measles-mumps-rubella vaccine delivered by disposable-syringe jet injector in India: A randomized, parallel group, non-inferiority trial. *Vaccine* 2018; **36**(9): 1220-6.
25. Sood AM, M.; Joshi, H. A.; Nayak, U. S.; Siddaiah, P.; Babu, T. R.; Mahapatro, S.; Sanmukhani, J.; Gupta, G.; Mittal, R.; Glueck, R. Immunogenicity and safety of a novel MMR vaccine (live, freeze-dried) containing the Edmonston-Zagreb measles strain, the Hoshino mumps strain, and the RA 27/3 rubella strain: Results of a randomized, comparative, active controlled phase III clinical trial. *Hum Vaccin Immunother* 2017; **13**(7): 1523-30.
26. Wiedmann RTR, K. S.; Hartzel, J.; Malacaman, E.; Senders, S. D.; Giacoletti, K. E.; Shaw, E.; Kuter, B. J.; Schodel, F.; Musey, L. K. M-M-R((R))II manufactured using recombinant human albumin (rHA) and M-M-R((R))II manufactured using human serum albumin (HSA) exhibit similar safety and immunogenicity profiles when administered as a 2-dose regimen to healthy children. *Vaccine* 2015; **33**(18): 2132-40.
27. He HC, E.; Chen, H.; Wang, Z.; Li, Q.; Yan, R.; Guo, J.; Zhou, Y.; Pan, J.; Xie, S. Similar immunogenicity of measles-mumps-rubella (MMR) vaccine administered at 8 months versus 12 months age in children. *Vaccine* 2014; **32**(31): 4001-5.

28. Prymula RB, M. R.; Esposito, S.; Gothefors, L.; Man, S.; Snegova, N.; Stefkovicova, M.; Usonis, V.; Wysocki, J.; Douha, M.; Vassilev, V.; Nicholson, O.; Innis, B. L.; Willems, P. Protection against varicella with two doses of combined measles-mumps-rubella-varicella vaccine versus one dose of monovalent varicella vaccine: a multicentre, observer-blind, randomised, controlled trial. *Lancet* 2014; **383**(9925): 1313-24.
29. Tabatabaei SRE, A. R.; Shiva, F.; Fallah, F.; Radmanesh, R.; Abdinia, B.; Shamshiri, A. R.; Khairkhah, M.; Ebrahimabad, H. S.; Karimi, A. Detection of Serum Antibodies against Measles, Mumps and Rubella after Primary Measles, Mumps and Rubella (MMR) Vaccination in Children. *Arch Iran Med* 2013; **16**(1): 38-41.
30. Saffar MJF, G. R.; Parsaei, M. R.; Ajami, A.; Khalilian, A. R.; Shojaei, J.; Saffar, H. Measles-Mumps-Rubella Revaccination; 18 Months vs. 4-6 Years of Age: Potential Impacts of Schedule Changes. *Journal of tropical pediatrics* 2011; **57**(5): 347-51.
31. Lee HK, H. W.; Cho, H. K.; Park, E. A.; Choi, K. M.; Kim, K. H. Reappraisal of MMR vaccines currently used in Korea. *Pediatr Int* 2011; **53**(3): 374-80.
32. Gomber SA, S. K.; Das, S.; Ramachandran, V. G. Immune response to second dose of MMR vaccine in Indian children. *Indian J Med Res* 2011; **134**(3): 302-6.
33. Rümke HC, Loch HP, Hoppenbrouwers K, et al. Immunogenicity and safety of a measles–mumps–rubella–varicella vaccine following a 4-week or a 12-month interval between two doses. *Vaccine* 2011; **29**(22): 3842-9.
34. Diaz-Ortega JLB, J. V.; Castaneda, D.; Vieyra, J. R.; Valdespino-Gomez, J. L.; de Castro, J. F. Successful seroresponses to measles and rubella following aerosolized Triviraten vaccine, but poor response to aerosolized mumps (Rubini) component: Comparisons with injected MMR. *Vaccine* 2010; **28**(3): 692-8.
35. Khalil MKN, H. M.; Al-Yahia, O. A.; Al-Saigul, A. M. Sero-response to measles vaccination at 12 months of age in Saudi infants in Qassim Province. *Saudi medical journal* 2008; **29**(7): 1009-13.
36. Peltola HJ, S.; Paunio, M.; Hovi, T.; Davidkin, I. Measles, mumps, and rubella in Finland: 25 years of a nationwide elimination programme. *Lancet Infect Dis* 2008; **8**(12): 796-803.

37. Lim FSH, H. H.; Bock, H. L. Safety, reactogenicity and immunogenicity of the live attenuated combined measles, mumps and rubella vaccine containing the RIT 4385 mumps strain in healthy Singaporean children. *Annals of the Academy of Medicine, Singapore* 2007; **36**(12): 969-73.
38. dos Santos BAS, S. M.; Siqueira, M. M.; Ranieri, T. S.; Bercini, M.; Schermann, M. T.; Wagner, M. B.; Silveira, T. R. Prevalence of antibodies against measles, mumps, and rubella before and after vaccination of school-age children with three different triple combined viral vaccines, Rio Grande do Sul, Brazil, 1996. *Revista panamericana de salud publica = Pan American journal of public health* 2006; **20**(5): 299-306.
39. Feiterna-Sperling CB, R.; Tischer, A.; Stettler, P.; Durrer, P.; Gaedicke, G. Open randomized trial comparing the immunogenicity and safety of a new measles-mumps-rubella vaccine and a licensed vaccine in 12- to 24-month-old children. *Pediatr Infect Dis J* 2005; **24**(12): 1083-8.
40. Redd SCK, G. E.; Heath, J. L.; Forghani, B.; Bellini, W. J.; Markowitz, L. E. Comparison of vaccination with measles-mumps-rubella vaccine at 9, 12, and 15 months of age. *J Infect Dis* 2004; **189** Suppl 1: S116-22.
41. Yadav ST, R.; Chakarvarti, A. Comparative evaluation of measles, mumps & rubella vaccine at 9 & 15 months of age. *Indian J Med Res* 2003; **118**: 183-6.
42. Lee CYT, R. B.; Huang, F. Y.; Tang, H.; Huang, L. M.; Bock, H. L. A new measles mumps rubella (MMR) vaccine: a randomized comparative trial for assessing the reactogenicity and immunogenicity of three consecutive production lots and comparison with a widely used MMR vaccine in measles primed children. *International journal of infectious diseases : IJID : official publication of the International Society for Infectious Diseases* 2002; **6**(3): 202-9.
43. Stuck BS, K.; Bock, H. L. Concomitant administration of varicella vaccine with combined measles, mumps, and rubella vaccine in healthy children aged 12 to 24 months of age. *Asian Pacific journal of allergy and immunology* 2002; **20**(2): 113-20.
44. Nolan T, McIntyre P, Robertson D, Descamps D. Reactogenicity and immunogenicity of a live attenuated tetravalent measles-mumps-rubella-varicella (MMRV) vaccine. *Vaccine* 2002; **21**(3-4): 281-9.

45. Ceyhan MK, G.; Erdem, G.; Kanra, B. Immunogenicity and efficacy of one dose measles-mumps-rubella (MMR) vaccine at twelve months of age as compared to monovalent measles vaccination at nine months followed by MMR revaccination at fifteen months of age. *Vaccine* 2001; **19**(31): 4473-8.
46. Gothefors LB, E.; Backman, M. Immunogenicity and reactogenicity of a new measles, mumps and rubella vaccine when administered as a second dose at 12 y of age. *Scandinavian journal of infectious diseases* 2001; **33**(7): 545-9.
47. GlaxoSmithKline. GlaxoSmithKline clinical trial register: 208136/016(MeMuRu-OKA-016). 2001.
48. GlaxoSmithKline. GlaxoSmithKline clinical trial register: 208136/007(MeMuRu-OKA-007). 2001.
49. Klinge JL, S.; Korn, K.; Heininger, U.; Stehr, K. Comparison of immunogenicity and reactogenicity of a measles, mumps and rubella (MMR) vaccine in German children vaccinated at 9-11, 12-14 or 15-17 months of age. *Vaccine* 2000; **18**(27): 3134-40.
50. Crovari PG, G.; Giammanco, G.; Dentico, P.; Moiraghi, A. R.; Ponzio, F.; Soncini, R. Reactogenicity and immunogenicity of a new combined measles-mumps-rubella vaccine: results of a multicentre trial. The Cooperative Group for the Study of MMR vaccines. *Vaccine* 2000; **18**(25): 2796-803.
51. Khalil MP, A. A.; al-Howasi, M.; Herzog, C.; Gerike, E.; Wegmuller, B.; Gluck, R. Response to measles revaccination among toddlers in Saudi Arabia by the use of two different trivalent measles-mumps-rubella vaccines. *Transactions of the Royal Society of Tropical Medicine and Hygiene* 1999; **93**(2): 214-9.
52. Gatchalian SC-Y, L.; Lu-Fong, M.; Soriano, R.; Ludan, A.; Chitour, K.; Bock, H. L. A randomized comparative trial in order to assess the reactogenicity and immunogenicity of a new measles mumps rubella (MMR) vaccine when given as a first dose at 12-24 months of age. *The Southeast Asian journal of tropical medicine and public health* 1999; **30**(3): 511-7.

53. Usonis VB, V.; Kaufhold, A.; Chitour, K.; Clemens, R. Reactogenicity and immunogenicity of a new live attenuated combined measles, mumps and rubella vaccine in healthy children. *Pediatr Infect Dis J* 1999; **18**(1): 42-8.
54. Mitchell LAT, A. J.; Decarie, D.; Lajeunesse, C. Serologic responses to measles, mumps, and rubella (MMR) vaccine in healthy infants: Failure to respond to measles and mumps components may influence decisions on timing of the second dose of MMR. *Can J Public Health-Rev Can Sante Publ* 1998; **89**(5): 325-8.
55. Schwarzer SR, S.; Lang, A. B.; Struck, M. M.; Finkel, B.; Gerike, E.; Tischer, A.; Gassner, M.; Gluck, R.; Stuck, B.; Cryz, S. J., Jr. Safety and characterization of the immune response engendered by two combined measles, mumps and rubella vaccines. *Vaccine* 1998; **16**(2-3): 298-304.
56. Forleo-Neto EC, E. S.; Fuentes, I. C.; Precivale, M. S.; Forleo, L. H.; Farhat, C. K. Seroconversion of a trivalent measles, mumps, and rubella vaccine in children aged 9 and 15 months. *Vaccine* 1997; **15**(17-18): 1898-901.
57. Bhargava IC, B. C.; Phadke, M. A.; Irani, S. F.; Chhapparwal, D.; Dhorje, S.; Maheshwari, C. P. Immunogenicity and reactogenicity of indigenously produced MMR vaccine. *Indian Pediatr* 1995; **32**(9): 983-8.
58. Cohn MLR, E. D.; Faerber, M.; Thomas, D.; Geyer, S.; Peters, S.; Martin, M.; Martin, A.; Sobel, D.; Jones, R.; Larkin, L.; Richert, J. R. Measles vaccine failures: Lack of sustained measles-specific immunoglobulin G responses in revaccinated adolescents and young adults. *Pediatr Infect Dis J* 1994; **13**(1): 34-8.
59. Eedes S, Pullan CR, Hull D. A randomised single blind trial of a combined mumps measles rubella vaccine to evaluate serological response and reactions in the UK population. *Public health* 1991; **105**(2): 91-7.
60. Dunlop JMR, K.; Roberts, J. S.; Bryett, K. A. An evaluation of measles, mumps and rubella vaccine in a population of Yorkshire infants. *Public health* 1989; **103**(5): 331-5.
61. Robertson CMB, V. J.; Jefferson, N.; Mayon-White, R. T. Serological evaluation of a measles, mumps, and rubella vaccine. *Arch Dis Child* 1988; **63**(6): 612-6.

62. Bottiger MC, B.; Romanus, V.; Taranger, J.; Strandell, A. Swedish experience of two dose vaccination programme aiming at eliminating measles, mumps, and rubella. *British medical journal (Clinical research ed)* 1987; **295**(6608): 1264-7.
63. Christenson BB, M.; Heller, L. Mass vaccination programme aimed at eradicating measles, mumps, and rubella in Sweden: first experience. *British medical journal (Clinical research ed)* 1983; **287**(6389): 389-91.
64. Isozaki MK-S, H.; Hoshi, N.; Takesue, R.; Takakura, I.; Kimura, M.; Hikino, M.; Mitsuda, M. Effects and side effects of a new trivalent combined measles-mumps-rubella (MMR) vaccine. *The Tokai journal of experimental and clinical medicine* 1982; **7**(5): 547-50.
65. Lerman SJ, Bollinger M, Brunken JM. Clinical and serologic evaluation of measles, mumps, and rubella (HPV-77:DE-5 and RA 27/3) virus vaccines, singly and in combination. *Pediatrics* 1981; **68**(1): 18-22.
66. Ehrenkranz NJV, A. K.; Medler, E. M.; Jackson, J. E.; Kenny, M. T. Clinical evaluation of a new measles-mumps-rubella combined live virus vaccine in the Dominican Republic. *Bull World Health Organ* 1975; **52**(1): 81-5.
67. Bloom JLS, G. M.; Graubarth, H.; Lipp, R. W.; Jackson, J. E.; Osborn, R. L.; Kenny, M. T. Evaluation of a trivalent measles, mumps, rubella vaccine in children. *J Pediatr* 1975; **87**(1): 85-7.
68. Carryn SF, M.; Povey, M.; Di Paolo, E. Long-term immunogenicity of measles, mumps and rubella-containing vaccines in healthy young children: A 10-year follow-up. *Vaccine* 2019; **37**(36): 5323-31.
69. LeBaron CWF, B.; Beck, C.; Brown, C.; Bi, D.; Cossen, C.; Sullivan, B. J. Persistence of mumps antibodies after 2 doses of measles-mumps-rubella vaccine. *J Infect Dis* 2009; **199**(4): 552-60.
70. LeBaron CWF, B.; Matter, L.; Reef, S. E.; Beck, C.; Bi, D. L.; Cossen, C.; Sullivan, B. J. Persistence of Rubella Antibodies after 2 Doses of Measles-Mumps-Rubella Vaccine. *J Infect Dis* 2009; **200**(6): 888-99.

71. LeBaron CWB, J.; Sullivan, B. J.; Forghani, B.; Bi, D.; Beck, C.; Audet, S.; Gargiullo, P. Persistence of measles antibodies after 2 doses of measles vaccine in a postelimination environment. *Archives of pediatrics & adolescent medicine* 2007; **161**(3): 294-301.
72. Kremer JRS, F.; Muller, C. P. Waning antibodies in measles and rubella vaccinees - a longitudinal study. *Vaccine* 2006; **24**(14): 2594-601.
73. Broliden KA, E. R.; Arneborn, M.; Bottiger, M. Immunity to mumps before and after MMR vaccination at 12 years of age in the first generation offered the two-dose immunization programme. *Vaccine* 1998; **16**(2-3): 323-7.
74. Broliden K, Levén B, Arneborn M, Böttiger M. Immunity to measles before and after MMR booster or primary vaccination at 12 years of age in the first generation offered the 2-dose immunization programme. *Scandinavian journal of infectious diseases* 1998; **30**(1): 23-7.
75. Davidkin IV, M.; Julkunen, I. Persistence of anti-mumps virus antibodies after a two-dose MMR vaccination. A nine-year follow-up. *Vaccine* 1995; **13**(16): 1617-22.
76. Miller EH, A.; Morgan-Capner, P.; Forsey, T.; Rush, M. Antibodies to measles, mumps and rubella in UK children 4 years after vaccination with different MMR vaccines. *Vaccine* 1995; **13**(9): 799-802.
77. Nolan TM, P.; Robertson, D.; Descamps, D. Reactogenicity and immunogenicity of a live attenuated tetravalent measles-mumps-rubella-varicella (MMRV) vaccine. *Vaccine* 2002; **21**(3-4): 281-9.
